# Supplementary material for: Competitive or sequential reaction of an electrophilic terminal phosphinidene metal(0) complex with allyl halides? [2+1]-cycloaddition vs. C–X bond insertion
Source: Royal Society of Chemistry journal article supplement (doi:10.1039/c9cc05328j), 2019-01-01
Supplement: c9cc05328j1.pdf [file c9cc05328j1.pdf]

## Electronic Supplementary Information (ESI)

### Competitive or sequential reactions of an electrophilic terminal phosphinidene metal(0) complex with allyl halides? [2+1]-Cycloaddition vs C-X bond insertion

Arif Ali Khan,<sup>a</sup> Philip Junker,<sup>b</sup> Gregor Schnakenburg,<sup>b</sup> Arturo Espinosa Ferao,<sup>c\*</sup> and Rainer Streubel<sup>b\*</sup>

The transiently generated electrophilic terminal phosphinidene complex  $[(\text{CO})_5\text{WPCH}(\text{SiMe}_3)_2]$  reacted in toluene with allyl halides ( $X = \text{F}, \text{Cl}, \text{Br}, \text{I}$ ) resulting in the formation of stable C-X insertion products **3a-c** and diastereomeric phosphirane complexes **4a,a',b,b'** as well as a methylene phosphirane complex **5** as observed by  $^{31}\text{P}\{^1\text{H}\}$  NMR spectroscopy. DFT calculations revealed that a novel rearrangement of transient phosphirane complexes was responsible.

## Table of Contents

|                                                           |         |
|-----------------------------------------------------------|---------|
| Experimental Procedures                                   |         |
| Synthesis of Complex <b>3a</b>                            | S3      |
| Synthesis of Complex <b>3b</b>                            | S3      |
| Synthesis of Complex <b>3c</b>                            | S4      |
| Table of reaction product ratios for <b>3-5</b>           | S4      |
| NMR/MS/IR Spectra                                         |         |
| Complex <b>3a</b>                                         | S5-S8   |
| Complex <b>3b</b>                                         | S9-S11  |
| Complex <b>3c</b>                                         | S12-S14 |
| Crystallographic Data                                     |         |
| Complex <b>3a</b>                                         | S15     |
| Complex <b>3b</b>                                         | S15     |
| Complex <b>3c</b>                                         | S16     |
| Table of crystallographic data comparison for <b>3a-c</b> | S16     |
| Computational Part                                        |         |
| Validation of simplified ( <i>P</i> -Me) model compounds  | S17     |
| Calculated structures                                     | S17-S26 |

## Experimental Procedures

All manipulations were carried out under an inert atmosphere of dry nitrogen using standard Schlenk techniques. Solvents were dried and degassed according to standard protocols. Tetrahydrofuran (THF), diethyl ether, petrol ether and n-pentane were dried over sodium wire/benzophenone,  $\text{CH}_2\text{Cl}_2$  over  $\text{CaH}_2$ , toluene over sodium and further purified by subsequent distillation. All spectra were recorded on a Bruker Avance 300 spectrometer at 25 °C. The  $^1\text{H}$  and  $^{13}\text{C}$  NMR spectra were referenced to the residual proton resonances and the  $^{13}\text{C}$  NMR signals of the deuterated solvents;  $^{31}\text{P}$  NMR spectra were referenced to 85%  $\text{H}_3\text{PO}_4$  and  $^{19}\text{F}$  NMR spectra to  $\text{CFCl}_3$  as an external standard, respectively. Melting points were determined in one-side melted off capillaries using a Büchi Type S apparatus and are uncorrected. Elemental analyses were carried out on a Vario EL gas chromatograph. Mass spectrometric data were collected on a Kratos Concept 1H Spectrometer. IR spectra of all compounds were recorded on a Thermo Nicolet 380 FT-IR spectrometer with an attenuated total reflection (ATR) attachment or a Bruker Alpha Diamond ATR FTIR spectrometer. X-ray data were collected with a Bruker X8-KappaApexII and Nonius KappaCCD diffractometer. CCDC 1917784-1917786 contain the supplementary crystallographic data.

**Synthesis of Complex 3a.** 2H-Azaphosphirene complex **1** (0.5 g, 0.80 mmol) was dissolved in 3 mL of toluene followed by addition of allyl fluoride as toluene solution (1.26 mmol) and was heated at 75°C for 15h. The excess of toluene was removed in vacuo and the product **3a** was isolated by column chromatography (Silica gel: 2x5 cm, T = -20°C) as fraction-1 using petrol ether as eluent and after evaporation of the latter in vacuo as light yellow solid. X-ray suitable single-crystals were grown in petrol ether at -25°C.

Yield of **3a** = 0.210 g ca. 46% (m.p. = 95°C).  $^1\text{H NMR}$  ( $\text{CDCl}_3$ )  $\delta$ : 0.22 (s, 9H,  $\text{SiMe}_3$ ), 0.24 (s, 9H,  $\text{SiMe}_3$ ), 1.95 (d,  $^2J_{\text{P,H}}$  = 12.0 Hz, 1H, PCH), 2.75 (m, 1H, = $\text{CH}_2$ ), 3.27 (m, 1H, = $\text{CH}_2$ ), 5.33 (m, 2H, P $\text{CH}_2$ ), 5.82 (m, 1H, =CH);  $^{31}\text{P NMR}$ :  $\delta$ : 192.3 ppm (d,  $^1J_{\text{W,P}}$  = 290 Hz,  $^1J_{\text{P,F}}$  = 827.7 Hz);  $^{13}\text{C NMR}$ :  $\delta$ : 2.00 (d,  $^3J_{\text{P,C}}$  = 3.6 Hz,  $\text{SiMe}_3$ ), 2.35 (d,  $^3J_{\text{P,C}}$  = 2.4 Hz,  $\text{SiMe}_3$ ), 32.6 (dd,  $^1J_{\text{P,C}}$  = 4.77 Hz), 43.6 (dd,  $^1J_{\text{P,C}}$  = 13.7 Hz), 121.7 (d, 4.8 Hz), 128.8 (d, 11.3 Hz) 196.1 (d,  $^2J_{\text{P,C}}$  = 8.3 Hz, *cis*-CO), 198.8 (d,  $^2J_{\text{P,C}}$  = 28.6 Hz, *trans*-CO);  $^{19}\text{F NMR}$ :  $\delta$ : -118.51 ppm (d,  $^1J_{\text{P,F}}$  = 827.7 Hz). Mass (EI, 70 eV): 572 (40%) [ $\text{M}^+$ ], 488 (70) [ $\text{M}^+$ -3CO], 432 (50) [ $\text{M}^+$ -5CO], 73 (100) [ $\text{SiMe}_3$ ]. IR (KBr) data ( $\text{cm}^{-1}$ ):  $\nu(\text{CO})$  1915 and 2064. Anal. Calcd. for  $\text{C}_{15}\text{H}_{24}\text{FO}_5\text{PSi}_2\text{W}$ : C, 31.37; H, 4.21; Found: C, 31.53; H, 4.32.

**Synthesis of Complex 3b.** 2H-Azaphosphirene complex **1** (0.617g, 1mmol) was dissolved in 3 mL of toluene followed by addition of allyl chloride (0.5 g, 6.5 mmol) and was heated at 75°C for 6h. The excess of toluene (and allyl chloride) was removed in vacuo and the product **3b** was isolated by column chromatography (neutral aluminum oxide: 2x5 cm, T = -20°C) as Fraction-1 with 2-5% diethylether in petrol ether which on evaporation afforded the light yellow solid. Suitable crystals were grown in diethylether at -25°C and data was collected.

Yield of **3b** = 0.30 g ca. 51% (m.p. = 72-75°C).  $^1\text{H NMR}$  ( $\text{CDCl}_3$ )  $\delta$ : 0.28 (s, 9H,  $\text{SiMe}_3$ ), 0.29 (s, 9H,  $\text{SiMe}_3$ ), 1.85 (d,  $^2J_{\text{P,H}}$  = 12.0 Hz, 1H, PCH), 3.04 (m, 1H, = $\text{CH}_2$ ), 3.35 (m, 1H, = $\text{CH}_2$ ), 5.33 (m, 2H, P $\text{CH}_2$ ), 5.90 (m, 1H, =CH);  $^{31}\text{P NMR}$ :  $\delta$ : 118 ppm ( $^1J_{\text{W,P}}$  = 277 Hz);  $^{13}\text{C NMR}$ :  $\delta$ : 2.1 (d,  $^3J_{\text{P,C}}$  = 3.2 Hz,  $\text{SiMe}_3$ ), 2.8 (d,  $^3J_{\text{P,C}}$  = 2.6 Hz,  $\text{SiMe}_3$ ), 29.9 (d,  $^1J_{\text{P,C}}$  = 16.8 Hz), 45.25 (d,  $^1J_{\text{P,C}}$  = 14.9 Hz), 121.34 (d, 12.3 Hz), 128.73 (d, 5.2 Hz) 196.05 (d,  $^2J_{\text{P,C}}$  = 7.8 Hz, *cis*-CO), 198.20 (d,  $^2J_{\text{P,C}}$  = 31.7 Hz, *trans*-CO). Mass (EI, 70 eV): 590 (8%) [ $\text{M}^+$ ], 506 (6) [ $\text{M}^+$ -3CO], 450 (15) [ $\text{M}^+$ -5CO], 231 (100) [ $\text{M}^+$ -( $\text{W}(\text{CO})_5+\text{Cl}$ )], 73 (50) [ $\text{SiMe}_3$ ]. IR (KBr) data ( $\text{cm}^{-1}$ ):  $\nu(\text{CO})$  1909, 1939, 1989 and 2074. Anal. Calcd. for  $\text{C}_{15}\text{H}_{24}\text{ClO}_5\text{PSi}_2\text{W}$ : C, 30.50; H, 4.09 Found: C, 30.69; H, 4.15.

**Synthesis of Complex 3c.** 2H-azaphosphirene complex **1** (0.617 g, 1 mmol) was dissolved in 3 mL of toluene followed by addition of allyl bromide (0.2 mL, 1.64 mmol) and was heated at 75°C for 2 h. The excess of toluene and allyl bromide was removed in vacuo and the product was isolated by column chromatography (Silica gel:2x5 cm, Temp. = -30°C) as fraction-2 with 10% diethylether in petrol ether on evaporation afforded the light yellow solid. Suitable crystals were grown in n-pentane at -25°C and data was collected.

Yield of **3c** = 0.120 g ca. 24% (m.p. =70-72°C). **<sup>1</sup>H NMR:** δ: 0.31 (s, 9H, SiMe<sub>3</sub>), 0.32 (s, 9H, SiMe<sub>3</sub>), 1.93 (d, <sup>2</sup>J<sub>P,H</sub> = 10.7 Hz, 1H, PCH), 3.18 (m, 1H, =CH<sub>2</sub>), 3.44 (m, 1H, =CH<sub>2</sub>), 5.37 (m, 2H, PCH<sub>2</sub>), 5.96 (m, 1H, =CH); **<sup>31</sup>P NMR:** δ: 102.4 ppm, <sup>1</sup>J<sub>W,P</sub> = 274.6 Hz; **<sup>13</sup>C NMR:** δ: 3.33 (d, <sup>3</sup>J<sub>P,C</sub> = 3.6 Hz, SiMe<sub>3</sub>), 3.77 (d, <sup>3</sup>J<sub>P,C</sub> = 2.4 Hz, SiMe<sub>3</sub>), 31.02 (d, <sup>1</sup>J<sub>P,C</sub> = 21.5 Hz), 46.45 (d, <sup>1</sup>J<sub>P,C</sub> = 11.9 Hz), 122.27 (d, 12.5 Hz), 130.52 (d, 5.9 Hz) 197.49 (d, <sup>2</sup>J<sub>P,C</sub> = 6.8 Hz, *cis*-CO), 199.30 (d, <sup>2</sup>J<sub>P,C</sub> = 31.6 Hz, *trans*-CO). Mass (EI, 70 eV): 633.90 (36%) [M<sup>+</sup>], 550 (22) [M<sup>+</sup>-3CO], 494 (70) [M<sup>+</sup>-5CO], 231 (100) [M<sup>+</sup>-(W(CO)<sub>5</sub>+Br)], 73 (45) [SiMe<sub>3</sub>]. IR (KBr) data (cm<sup>-1</sup>): ν(CO) 1930 and 2073. Anal. Calcd. for C<sub>15</sub>H<sub>24</sub>BrO<sub>5</sub>PSi<sub>2</sub>W: C, 28.36; H, 3.81; Found: C, 28.43; H, 3.89.

**Table S1:** Product ratios obtained from NMR integration of the corresponding signals from the reaction with allyl-X.

|        | <b>3 / %</b> | <b>4,4' / %</b> | <b>5 / %</b> |
|--------|--------------|-----------------|--------------|
| X = F  | 19           | 75              | 6            |
| X = Cl | 17           | 80              | 3            |

# NMR/MS/IR Spectra

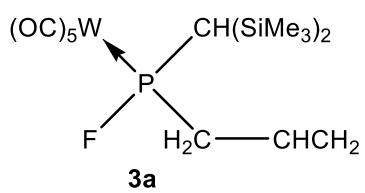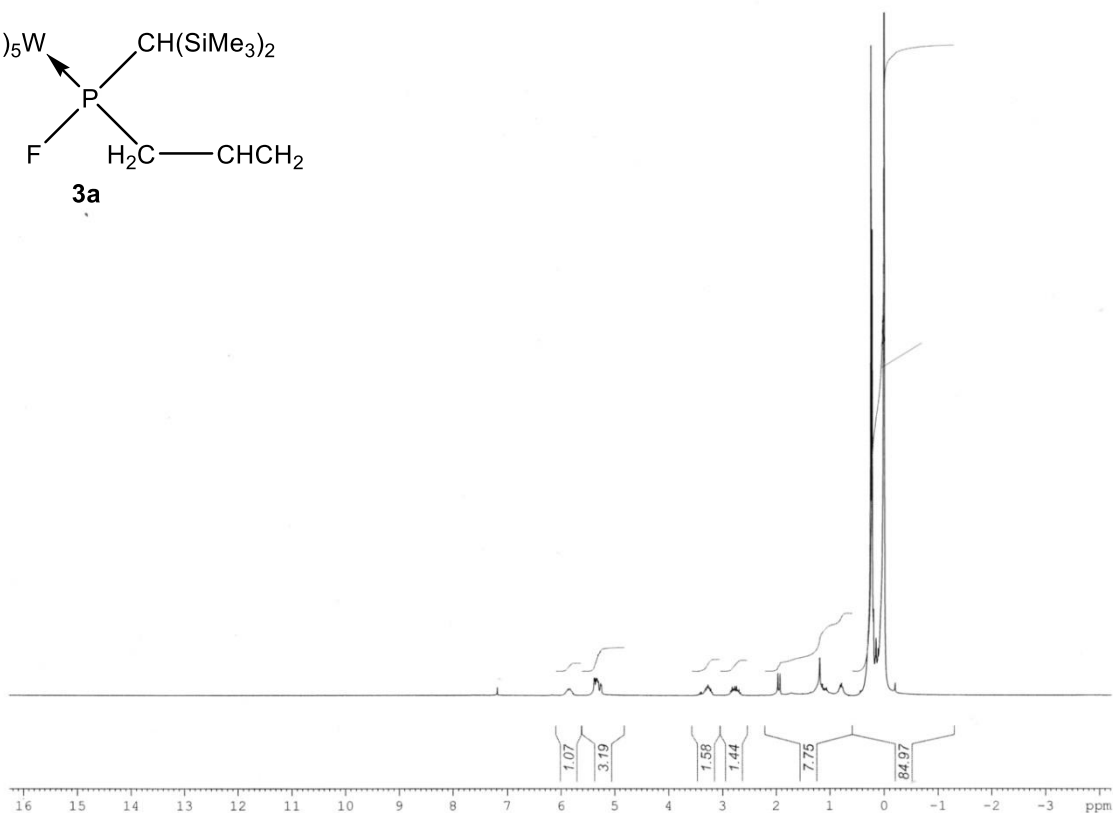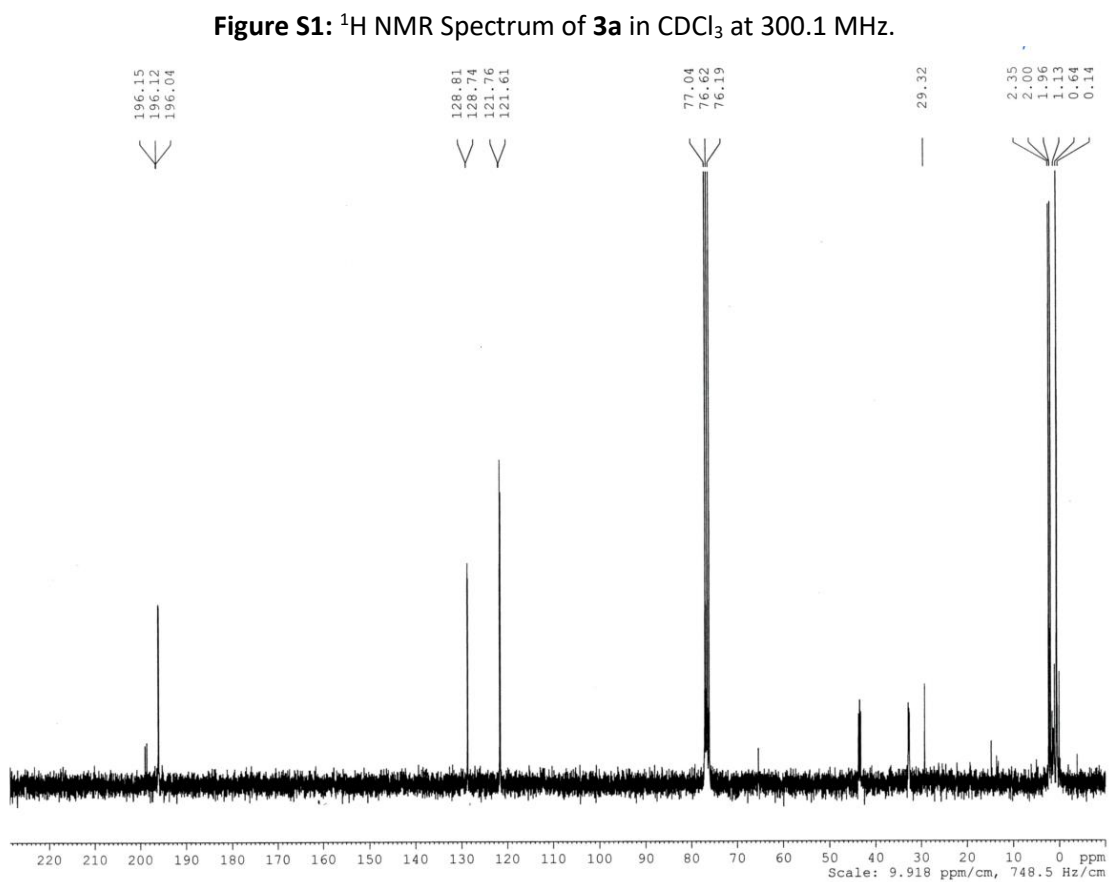

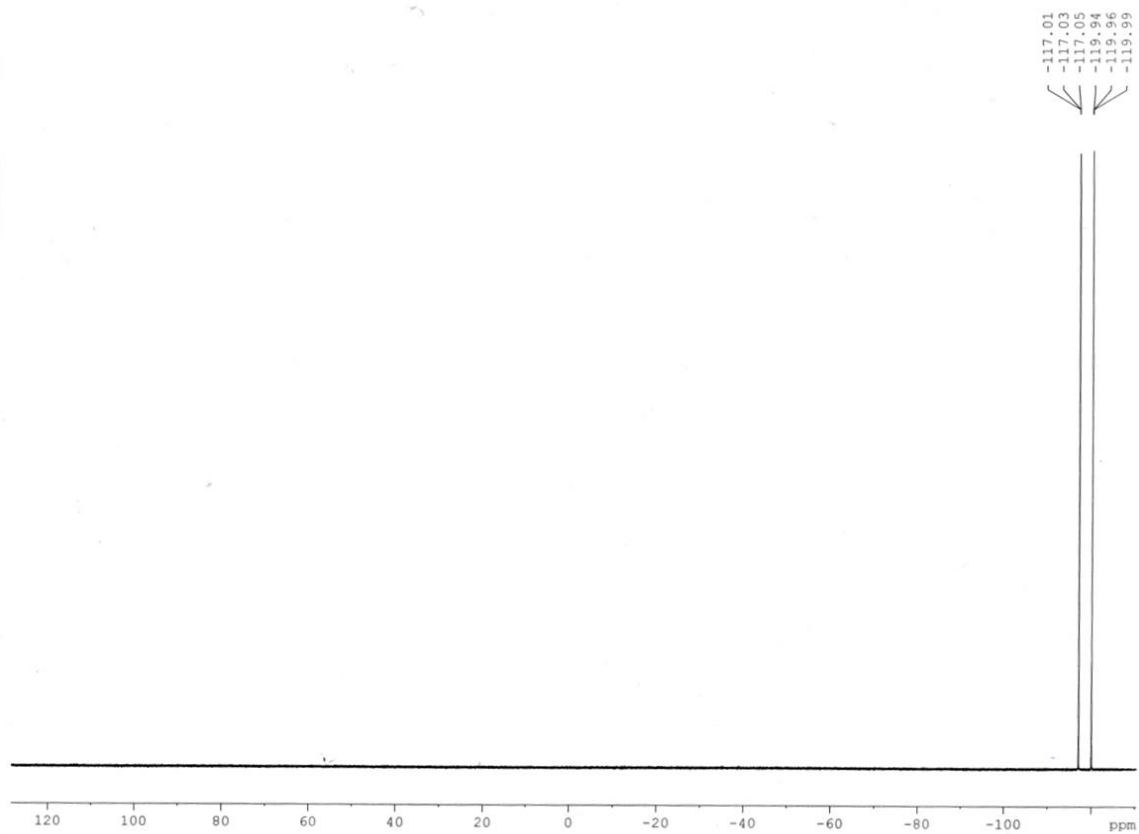

**Figure S3:**  $^{19}\text{F}\{^1\text{H}\}$  NMR Spectrum of **3a** in  $\text{CDCl}_3$  at 282.4 MHz.

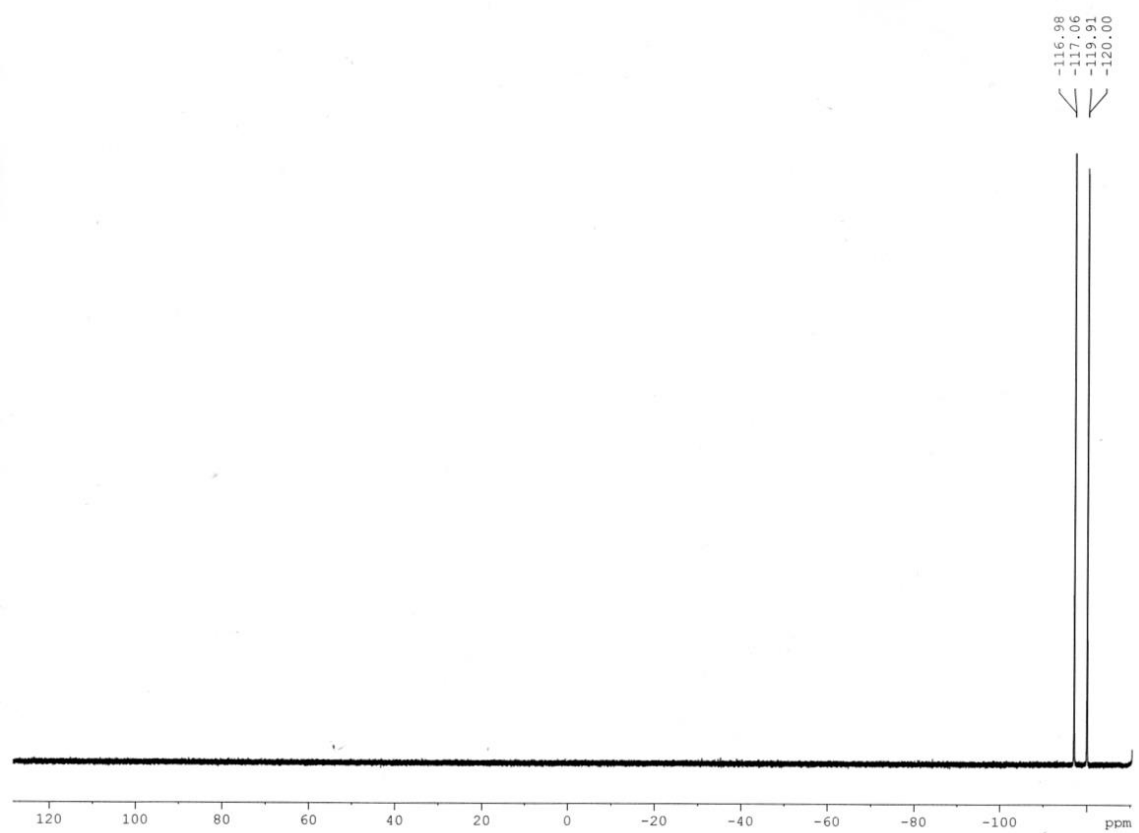

**Figure S4:**  $^{19}\text{F}$  NMR Spectrum of **3a** in  $\text{CDCl}_3$  at 282.4 MHz.

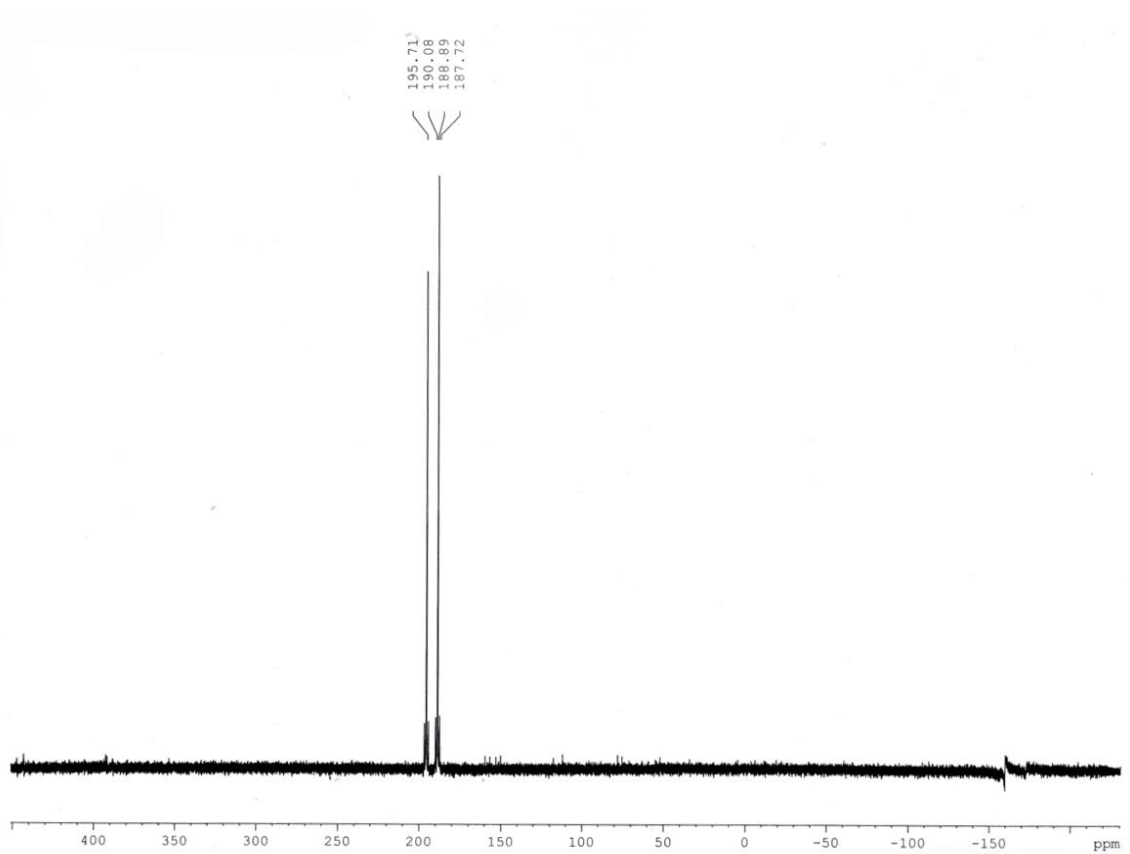

Figure S5: <sup>31</sup>P{<sup>1</sup>H} NMR Spectrum of **3a** in CDCl<sub>3</sub> at 121.5 MHz.

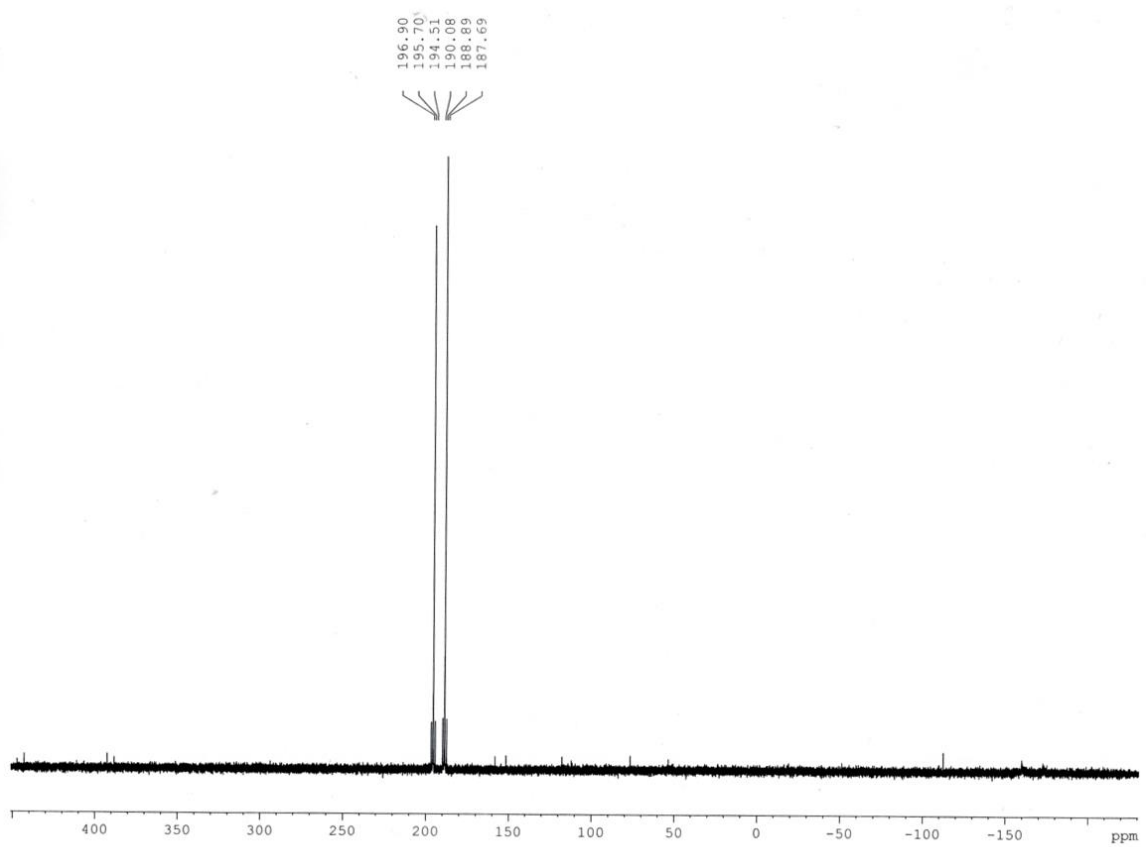

Figure S6: <sup>31</sup>P NMR Spectrum of **3a** in CDCl<sub>3</sub> at 121.5 MHz.

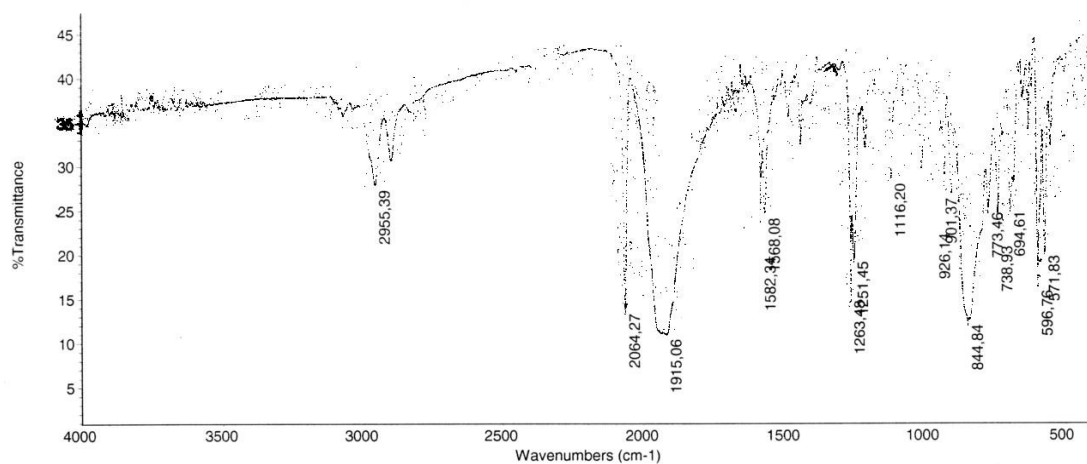

Figure S7: IR Spectrum of 3a.

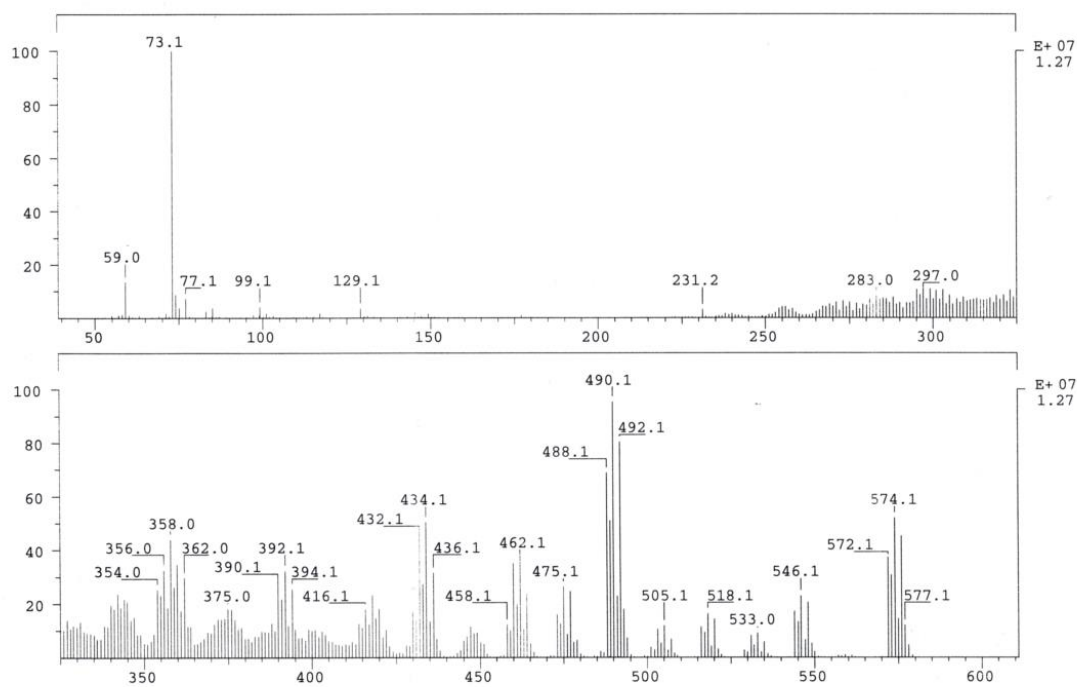

Figure S8: MS Spectrum (EI, 70 eV,  $^{184}\text{W}$ ) of 3a.



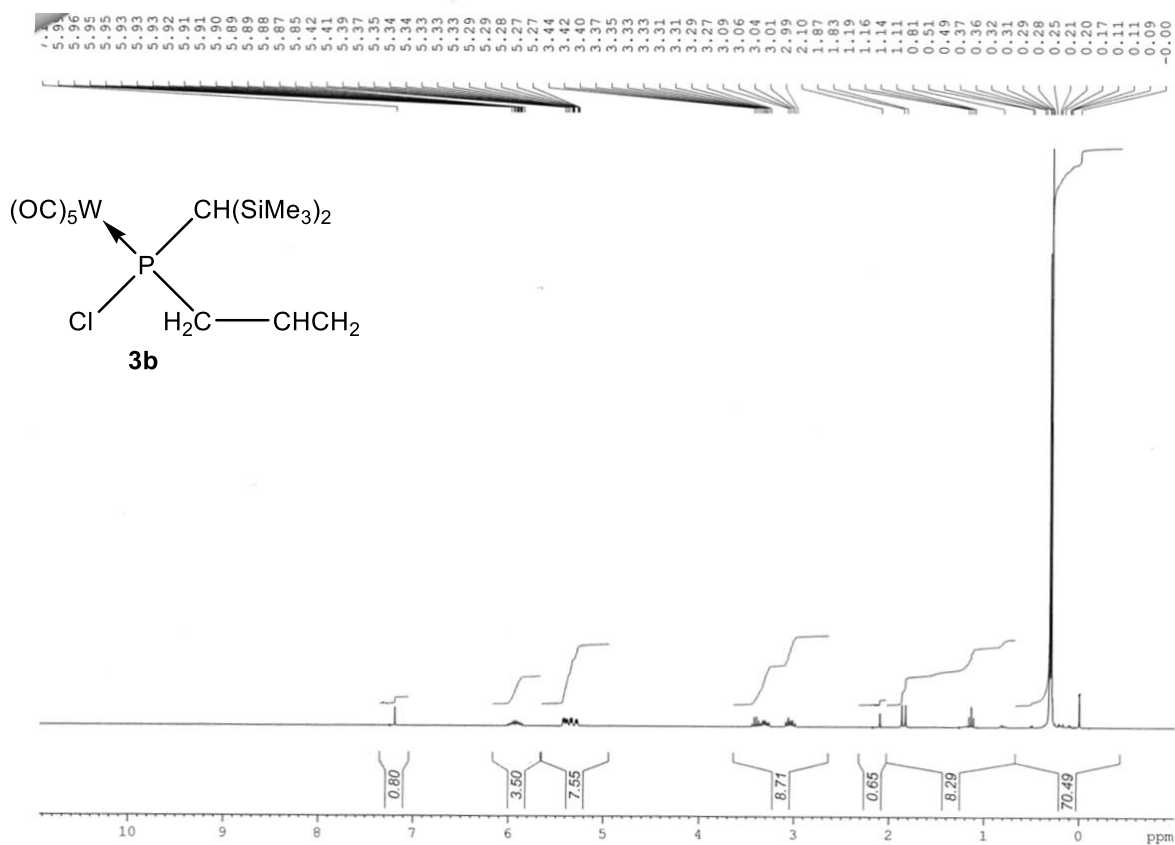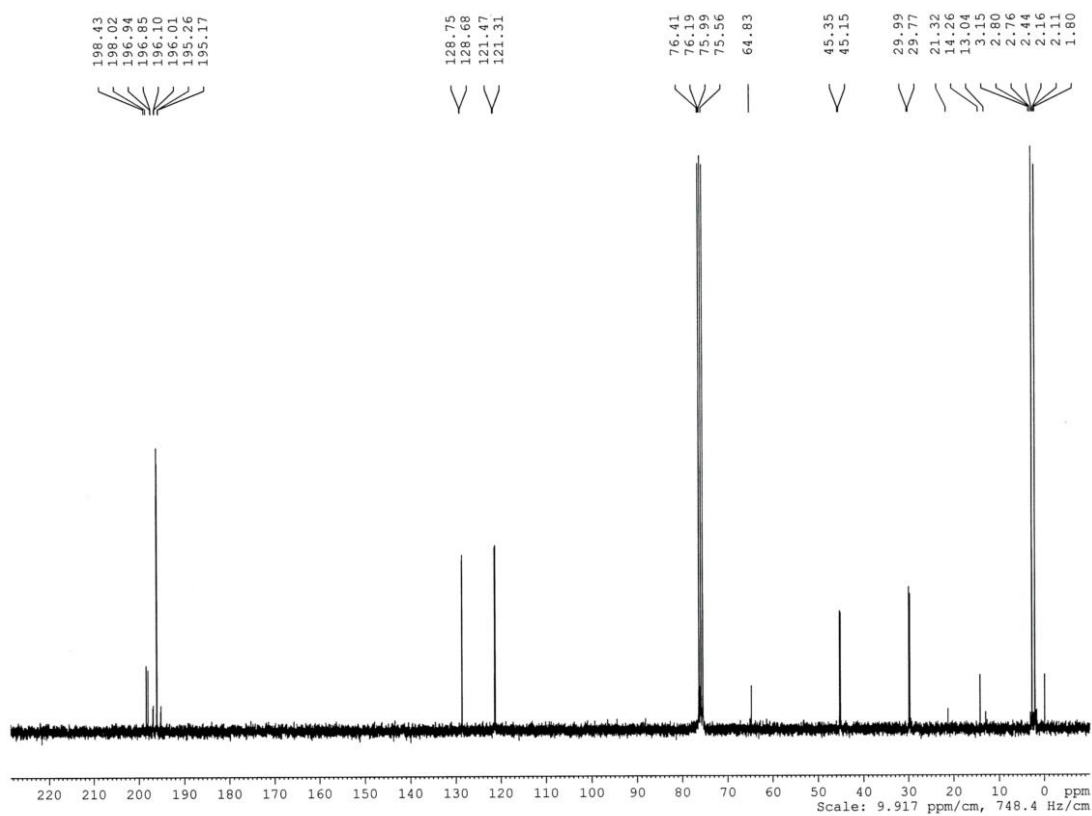

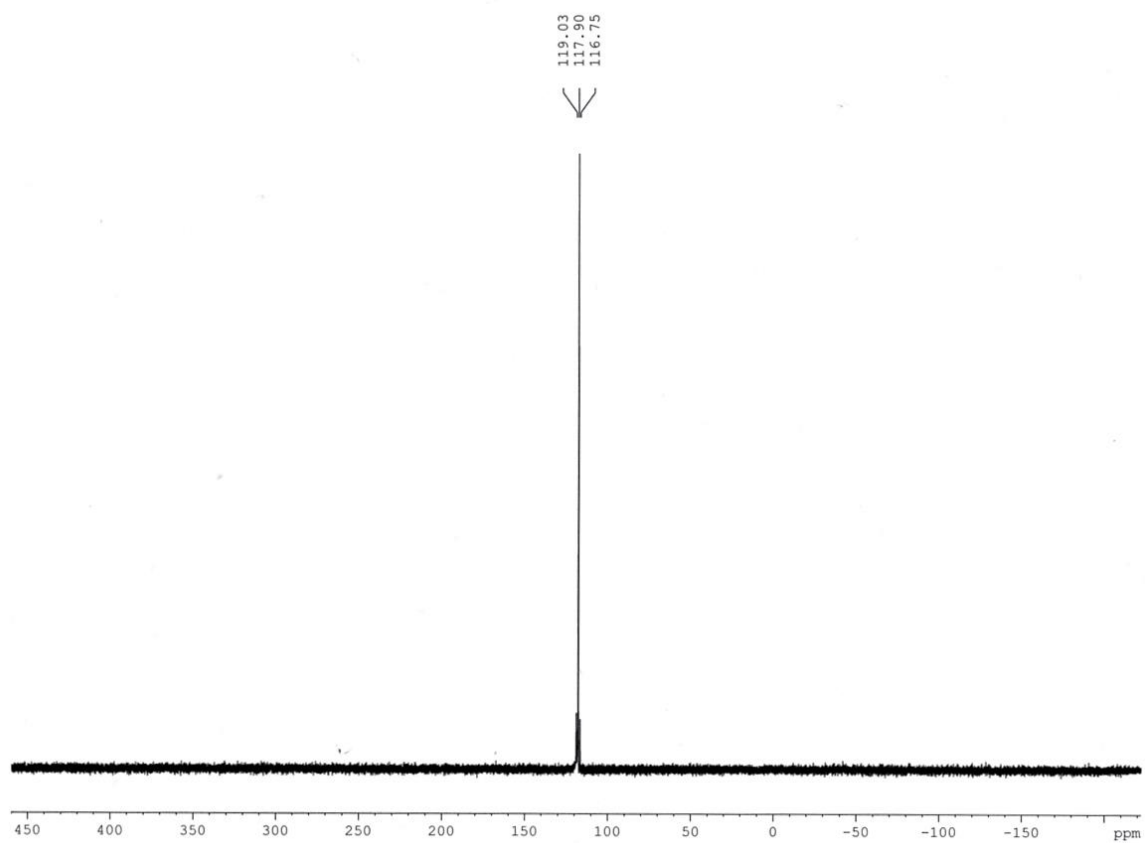

**Figure S11:** <sup>31</sup>P{<sup>1</sup>H} NMR Spectrum of **3b** in CDCl<sub>3</sub> at 121.5 MHz.

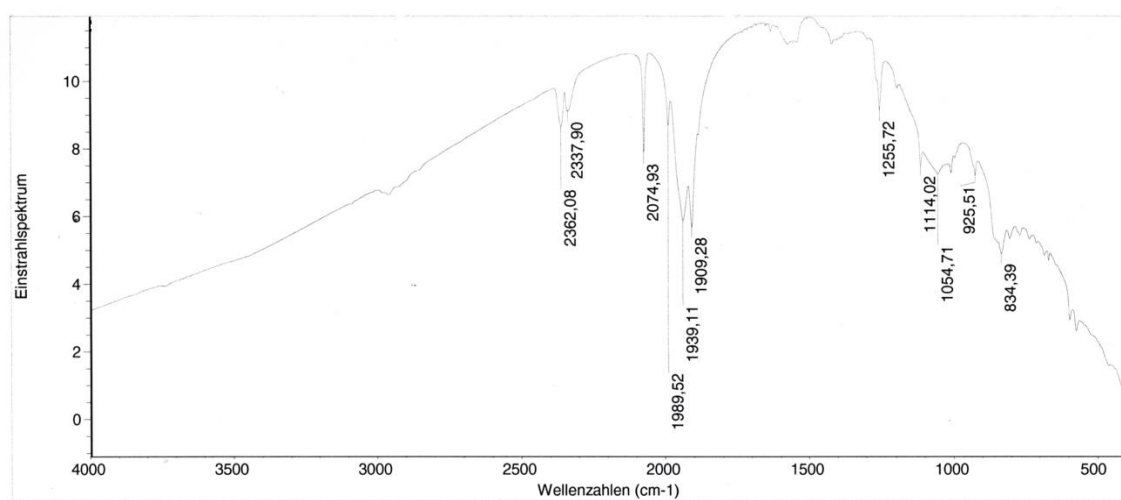

**Figure S12:** IR Spectrum of **3b**.

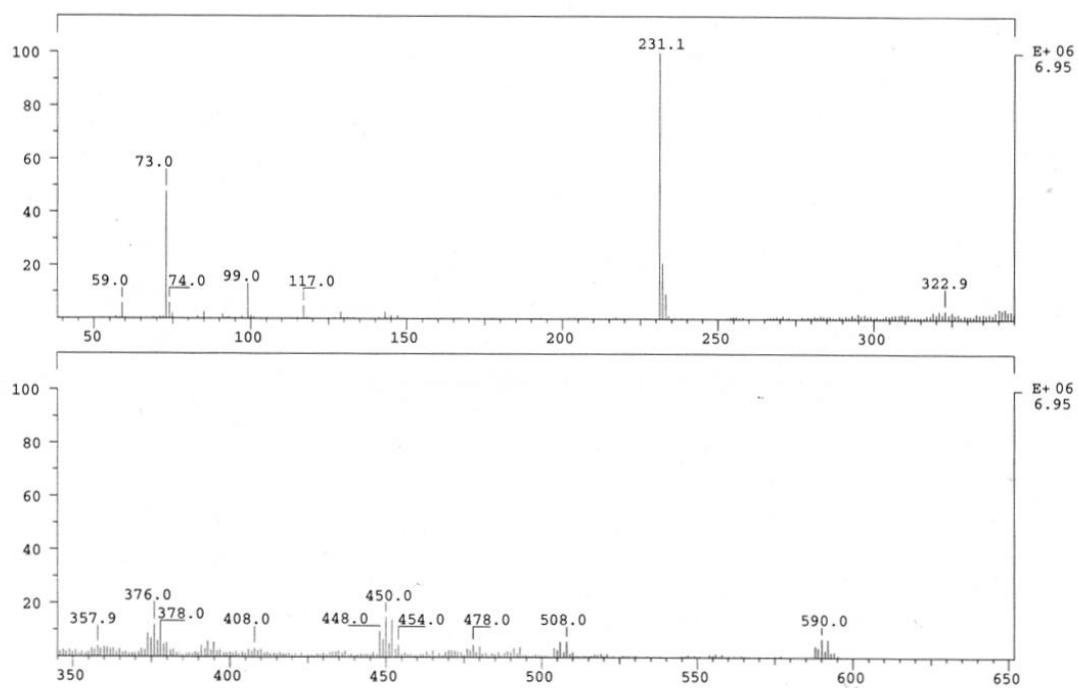

Figure S13: MS Spectrum (EI, 70 eV,  $^{184}\text{W}$ ) of **3b**.

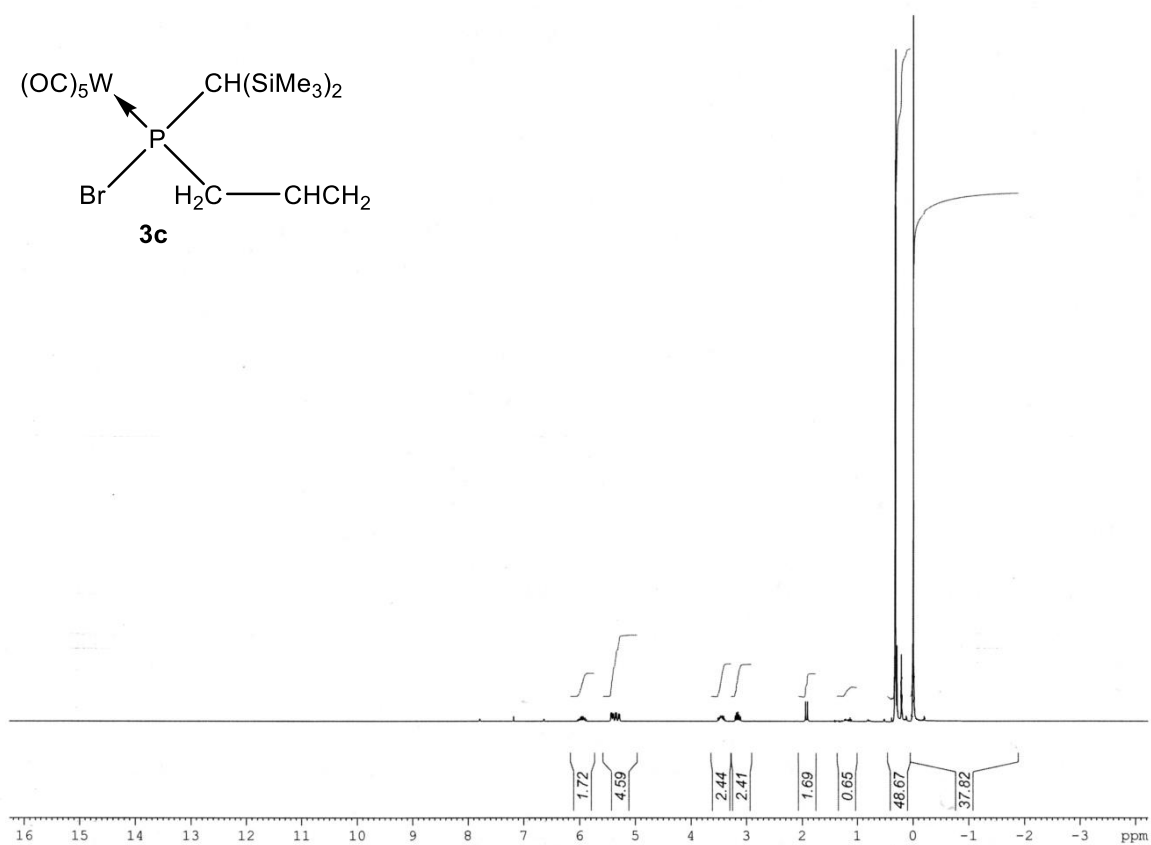

Figure S14:  $^1\text{H}$  NMR Spectrum of **3c** in  $\text{CDCl}_3$  at 300.1 MHz.

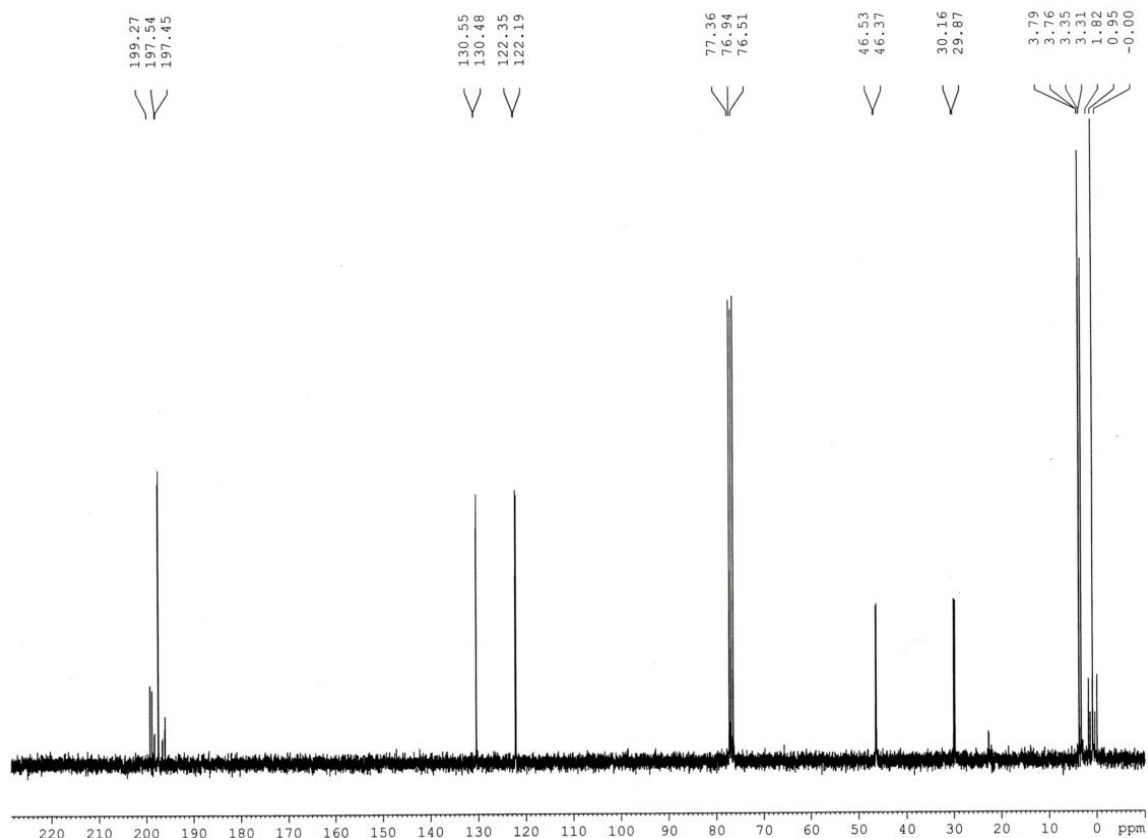

Figure S15:  $^{13}\text{C}\{^1\text{H}\}$  NMR of **3c** in  $\text{CDCl}_3$  at 75.5 MHz.

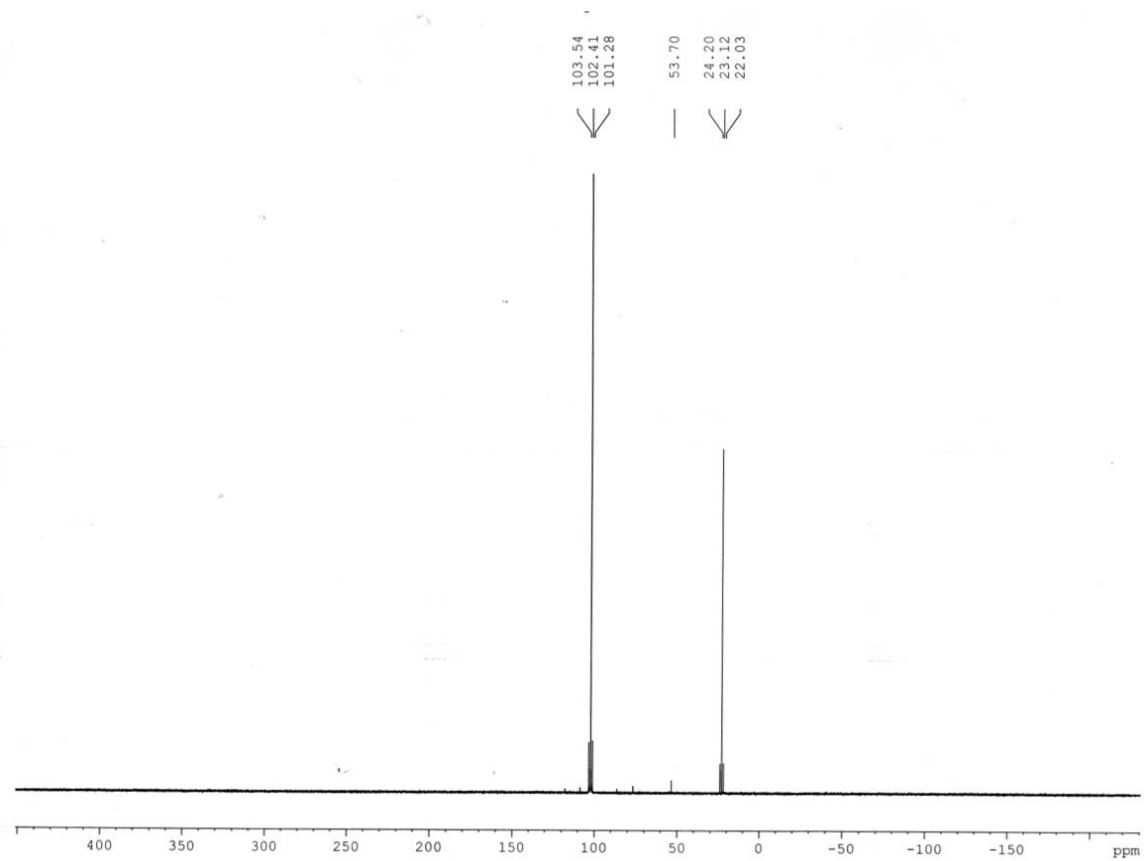

Figure S16:  $^{31}\text{P}\{^1\text{H}\}$  NMR Spectrum of **3c** (81 %) and **6** (19 %) in  $\text{CDCl}_3$  at 121.5 MHz.

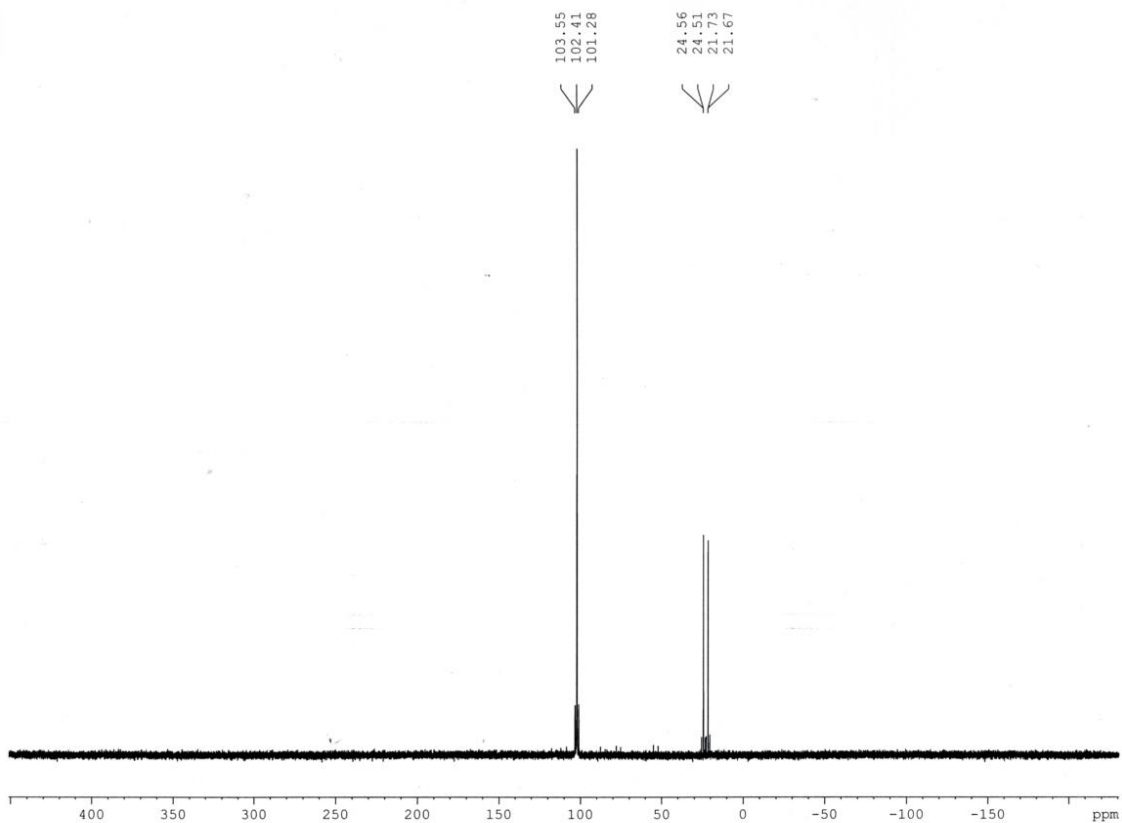

Figure S17: <sup>31</sup>P NMR Spectrum of **3c** (81 %) and **6** (19 %) in CDCl<sub>3</sub> at 121.5 MHz.

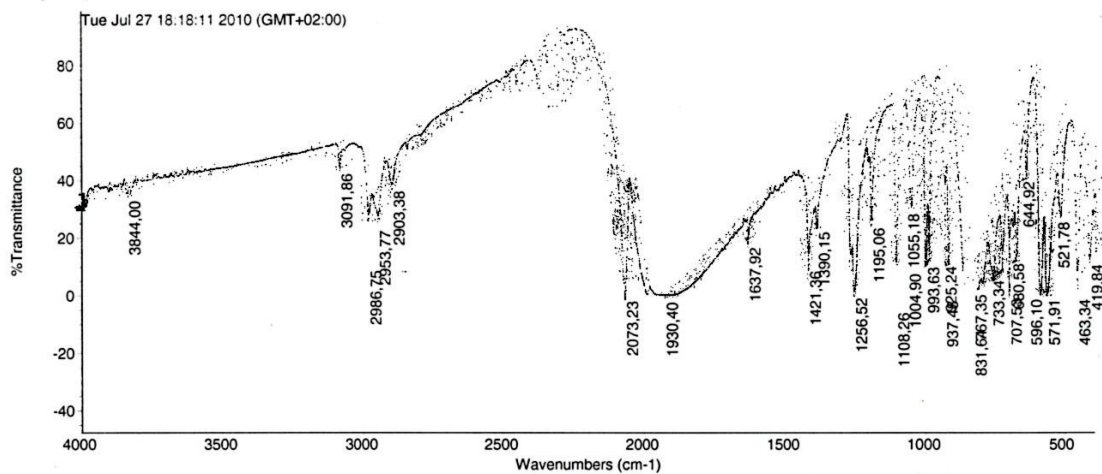

Figure S18: IR Spectrum of **3c**.

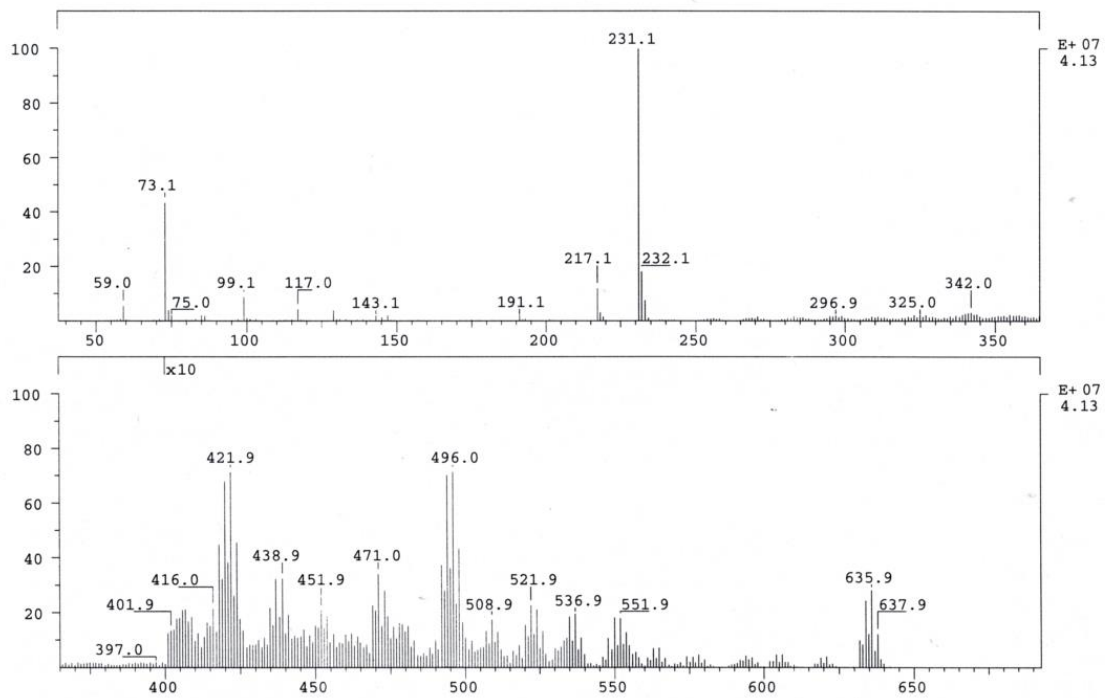

**Figure S19:** MS Spectrum (EI, 70 eV,  $^{184}\text{W}$ ) of **3c**.

## Crystallographic Data

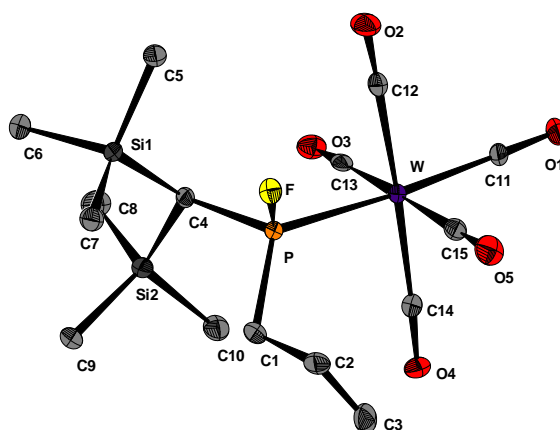

*Crystal Data for 3a:* Suitable single crystals of **3a** were obtained from a concentrated diethylether solution at 4 °C. Data were collected with a Nonius KappaCCD diffractometer equipped with a low-temperature device at 100.2 K by using graphite-monochromated Mo K $\alpha$  radiation ( $\lambda = 0.71073$  Å). The structure was solved by Patterson methods (SHELXS-97) and refined by full-matrix least squares on F<sup>2</sup> (SHELXL-97): C<sub>15</sub>H<sub>24</sub>FO<sub>5</sub>PSi<sub>2</sub>W,  $M_r = 574.34$ , crystal dimensions 0.40 × 0.40 × 0.30 mm<sup>3</sup>, monoclinic, space group P2<sub>1</sub>/n, Z = 4, a = 9.4372(3) Å, b = 18.8621(6) Å, c = 12.3957(4) Å,  $\alpha = 90^\circ$ ,  $\beta = 94.0074(18)^\circ$ ,  $\gamma = 90^\circ$ , V = 2201.11(12) Å<sup>3</sup>,  $\rho_{\text{calc}} = 1.733$  g cm<sup>-3</sup>,  $\mu = 5.458$  mm<sup>-1</sup>, transmission factors (min/max) 0.124/0.190, semi-empirical absorption correction,  $2\theta_{\text{max}} = 25.25^\circ$ , no. of unique data 3926,  $R_{\text{int}} = 0.1526$ ,  $R_1$  (for  $I > 2\sigma(I)$ ) = 0.0567,  $wR_2$  (for all data) = 0.1527, final  $R_1 = 0.619$ , goodness of fit 1.029,  $\Delta F(\text{max/min}) = 2.866 / -3.098$  e Å<sup>-3</sup>. CCDC 1917785.

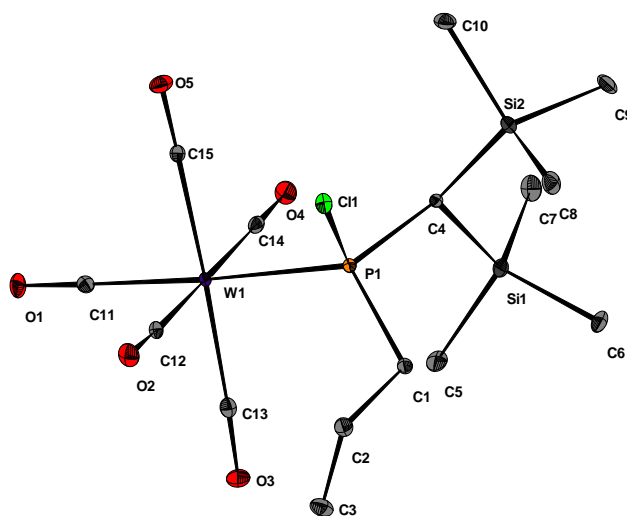

*Crystal Data for 3b:* Suitable single crystals of **3b** were obtained from a concentrated diethylether solution at 4 °C. Data were collected with a X8-KappaApexII diffractometer equipped with a low-temperature device at 100.2 K by using graphite-monochromated Mo K $\alpha$  radiation ( $\lambda = 0.71073$  Å). The structure was solved by Patterson methods (SHELXS-97) and refined by full-matrix least squares on F<sup>2</sup> (SHELXL-97): C<sub>15</sub>H<sub>24</sub>ClO<sub>5</sub>PSi<sub>2</sub>W,  $M_r = 590.79$ , crystal dimensions 0.60 × 0.60 × 0.60 mm<sup>3</sup>, orthorhombic, space group Pbca, Z = 8, a = 18.1955(6) Å, b = 13.3383(5) Å, c = 18.5737(7) Å,  $\alpha = 90^\circ$ ,  $\beta = 90^\circ$ ,  $\gamma = 90^\circ$ , V = 4507.8(3) Å<sup>3</sup>,  $\rho_{\text{calc}} = 1.741$  g cm<sup>-3</sup>,  $\mu = 5.441$  mm<sup>-1</sup>, transmission factors (min/max) 0.04/0.05, integrational absorption correction,  $2\theta_{\text{max}} = 28.00^\circ$ , no. of unique data 5426,  $R_{\text{int}} = 0.0390$ ,  $R_1$  (for  $I > 2\sigma(I)$ ) = 0.0217,  $wR_2$  (for all data) = 0.0492, final  $R_1 = 0.0239$ , goodness of fit 1.171,  $\Delta F(\text{max/min}) = 1.340 / -0.949$  e Å<sup>-3</sup>. CCDC 1917784.

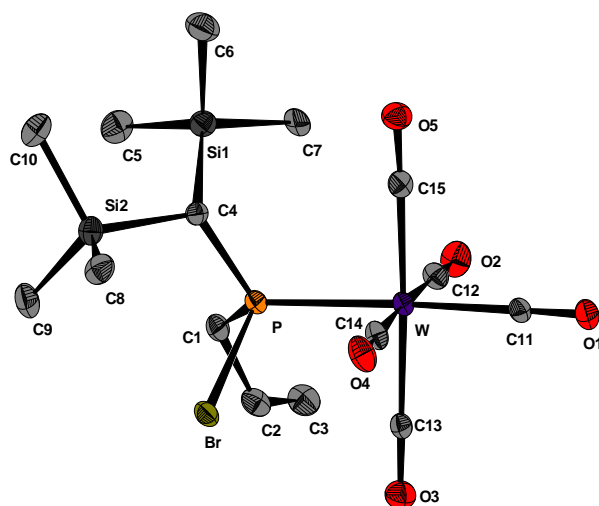

*Crystal Data for 3c:* Suitable single crystals of **3c** were obtained from a concentrated diethylether solution at 4 °C. Data were collected with a Nonius KappaCCD diffractometer equipped with a low-temperature device at 123.2 K by using graphite-monochromated Mo K $\alpha$  radiation ( $\lambda = 0.71073$  Å). The structure was solved by Patterson methods (SHELXS-97) and refined by full-matrix least squares on F<sup>2</sup> (SHELXL-97): C<sub>15</sub>H<sub>24</sub>BrO<sub>5</sub>PSi<sub>2</sub>W,  $M_r = 635.25$ , crystal dimensions 0.60 × 0.30 × 0.04 mm<sup>3</sup>, orthorhombic, space group Pbc<sub>a</sub>, Z = 8, a = 18.0162(4) Å, b = 13.6552(3) Å, c = 18.5562(6) Å,  $\alpha = 90^\circ$ ,  $\beta = 90^\circ$ ,  $\gamma = 90^\circ$ , V = 4565.1(2) Å<sup>3</sup>,  $\rho_{\text{calc}} = 1.849$  g cm<sup>-3</sup>,  $\mu = 7.006$  mm<sup>-1</sup>, transmission factors (min/max) 0.1019/0.7669, semi-empirical absorption correction,  $2\theta_{\text{max}} = 27.99^\circ$ , no. of unique data 5494,  $R_{\text{int}} = 0.0923$ ,  $R_1$  (for I > 2 $\sigma(I)$ ) = 0.0393,  $wR_2$  (for all data) = 0.0973, final  $R_1 = 0.0633$ , goodness of fit 0.957,  $\Delta F$  (max/min) = 2.023 / -2.310 e Å<sup>-3</sup>. CCDC 1917786.

**Table S2:** Crystal data comparison for complexes **3-c** (bond angles in [°]).

|                    | C(4)-P-X   | X-P-W      |
|--------------------|------------|------------|
| <b>3a</b> (X = F)  | 102.9(3)   | 107.88(17) |
| <b>3b</b> (X = Cl) | 106.34(9)  | 106.06(3)  |
| <b>3c</b> (X = Br) | 107.20(17) | 105.22(6)  |



## Computational part.

### Validation of *P*-methyl substitution in model derivatives.

In order to assess the validity of using a methyl group as *P*-substituent instead of the Tms<sub>2</sub>CH- (bisyl) group which is present in the experimentally used and obtained compounds, the structures for the latter were computed at the working level of theory for the case of X = F (i.e., **3a**, **4a<sup>ap</sup>** and **5+HF**), including the key intermediate **8** (**8<sup>bis</sup>·HF**) that is the most sensitive with regard to the nature of the *P*-substituent, and compared with model (*P*-Me substituted) compounds (**3a<sup>Me</sup>**, **4a<sup>ap-Me</sup>**, **5<sup>Me</sup>·HF** and **8·HF**). Their energies, as well as those for the initial reagents are collected in Table S3.

**Table S3:** Computed (CCSD(T)/def2-TZVPPecp//B3LYP-D3/def2-TZVPe cp) zero-point energy-corrected energies (kcal/mol) relative to the most stable isomer.

|                           |                        |                           |                          |                           |
|---------------------------|------------------------|---------------------------|--------------------------|---------------------------|
| <b>7<sup>bis</sup>+2a</b> | <b>3a<sup>ap</sup></b> | <b>4a</b>                 | <b>5+HF</b>              | <b>8<sup>bis</sup>·HF</b> |
| 68.80                     | 0.00                   | 33.25                     | 46.33                    | 43.83                     |
| <b>7+2a</b>               | <b>3a<sup>Me</sup></b> | <b>4a<sup>ap-Me</sup></b> | <b>5<sup>Me</sup>·HF</b> | <b>8·HF</b>               |
| 75.54                     | 0.00                   | 32.72                     | 45.30                    | 42.88                     |

The relative energies of all four products and intermediate (**3**, **4**, **5** and **8**) are very similar in both the *P*-methyl and *P*-bisyl series (differences below 1.03 kcal/mol), which validates the use of *P*-methyl model derivatives for the computational study. The most significant difference is the relative instability of the *P*-methyl model phosphinidene **7** compared to **7<sup>bis</sup>** (by 6.74 kcal/mol).

### Calculated structures.

Cartesian coordinates (in Å) and ZPE-correction (hartrees) for all computed species at the optimization level. Imaginary frequency (cm<sup>-1</sup>) for transition states. Electronic energies (hartrees) at the DLPNO-CCSD(T)/def2-TZVPPecp level.

**2a** E = -216.813464594068 au  
ZPE = 0.0727911 au

|   |           |           |           |   |           |           |           |
|---|-----------|-----------|-----------|---|-----------|-----------|-----------|
| C | -0.068069 | 0.184876  | -0.025901 | C | -1.242037 | -0.071805 | -2.197978 |
| H | -0.016973 | 0.072423  | 1.049461  | H | -1.410121 | -1.049084 | -2.660032 |
| H | 0.801099  | 0.609527  | -0.515952 | H | -0.347320 | 0.382260  | -2.628551 |
| C | -1.140145 | -0.180222 | -0.715591 | F | -2.338603 | 0.730996  | -2.546765 |
| H | -2.007081 | -0.594817 | -0.210082 |   |           |           |           |

**2b** E = -576.808546937639 au  
ZPE = 0.07135484 au

|   |           |           |           |    |           |           |           |
|---|-----------|-----------|-----------|----|-----------|-----------|-----------|
| C | -0.056101 | 0.229801  | -0.006283 | C  | -1.185574 | -0.142539 | -2.181733 |
| H | -0.013193 | 0.136478  | 1.071107  | H  | -1.342325 | -1.119207 | -2.635824 |
| H | 0.786441  | 0.709281  | -0.491732 | H  | -0.310745 | 0.329557  | -2.621673 |
| C | -1.091903 | -0.222790 | -0.700658 | Cl | -2.624274 | 0.852000  | -2.689482 |
| H | -1.931577 | -0.688426 | -0.195112 |    |           |           |           |

**7****E = -1013.2882925228 au****ZPE = 0.07775263 au**

|   |           |           |           |   |           |           |           |
|---|-----------|-----------|-----------|---|-----------|-----------|-----------|
| P | -1.284747 | 1.079864  | 0.277127  | C | -3.066926 | -1.358971 | -0.617762 |
| C | -1.007794 | -0.101120 | 1.673095  | O | -3.703662 | -2.037188 | 0.044012  |
| H | -1.971071 | -0.165786 | 2.196951  | C | -3.420434 | 1.254362  | -2.027821 |
| H | -0.292985 | 0.310534  | 2.387598  | O | -4.265372 | 2.005073  | -2.178869 |
| H | -0.716119 | -1.110789 | 1.386654  | C | -0.634178 | 1.202872  | -2.799164 |
| W | -1.866963 | -0.101535 | -1.746637 | O | 0.039949  | 1.925539  | -3.368107 |
| C | -2.383001 | -1.074536 | -3.531556 | C | -0.313170 | -1.428296 | -1.401777 |
| O | -2.659305 | -1.627484 | -4.490050 | O | 0.534614  | -2.154614 | -1.163896 |

**7<sup>bis</sup>****E = -1829.34484869038 au****ZPE = 0.28198258 au**

|    |           |           |           |   |           |           |           |
|----|-----------|-----------|-----------|---|-----------|-----------|-----------|
| P  | -0.045388 | 0.275046  | 0.171346  | H | -1.147789 | -2.654305 | 1.641225  |
| C  | -0.939970 | 0.661528  | 1.692392  | C | 1.069564  | -0.254585 | 3.953553  |
| H  | -2.026338 | 0.578226  | 1.579604  | H | 1.308287  | -1.078063 | 4.631621  |
| Si | -0.605143 | 2.463899  | 2.241987  | H | 1.915834  | -0.124992 | 3.276698  |
| C  | 1.224671  | 2.865477  | 2.292808  | H | 0.972063  | 0.650095  | 4.554543  |
| H  | 1.713016  | 2.608480  | 1.351576  | C | -1.968057 | -0.792114 | 4.169543  |
| H  | 1.350726  | 3.939360  | 2.454640  | H | -1.786570 | -1.570177 | 4.915967  |
| H  | 1.747947  | 2.343561  | 3.093300  | H | -2.163458 | 0.141256  | 4.697212  |
| C  | -1.431495 | 3.575757  | 0.975460  | H | -2.869428 | -1.065832 | 3.616896  |
| H  | -1.343188 | 4.625042  | 1.267847  | W | -1.476157 | -0.490184 | -1.648274 |
| H  | -0.969364 | 3.466348  | -0.008406 | C | -2.572460 | -1.114348 | -3.304279 |
| H  | -2.493611 | 3.348207  | 0.867620  | O | -3.185042 | -1.445786 | -4.209955 |
| C  | -1.388201 | 2.783153  | 3.918989  | C | -2.829747 | -1.206568 | -0.274105 |
| H  | -1.301639 | 3.845545  | 4.162081  | O | -3.550071 | -1.576429 | 0.535429  |
| H  | -2.450366 | 2.529744  | 3.918226  | C | -2.564347 | 1.276413  | -1.652809 |
| H  | -0.906368 | 2.221327  | 4.720239  | O | -3.195003 | 2.227953  | -1.639573 |
| Si | -0.497373 | -0.668901 | 3.012546  | C | 0.000123  | 0.287474  | -2.880369 |
| C  | -0.257734 | -2.340692 | 2.188079  | O | 0.831873  | 0.718377  | -3.533137 |
| H  | 0.585074  | -2.340985 | 1.492927  | C | -0.481357 | -2.319913 | -1.629020 |
| H  | -0.053683 | -3.098435 | 2.949332  | O | 0.055217  | -3.326481 | -1.609069 |

**4a<sup>ap</sup>****E = -2046.22011919196 au****ZPE = 0.35992659 au**

|    |           |           |           |    |           |           |           |
|----|-----------|-----------|-----------|----|-----------|-----------|-----------|
| P  | -0.043642 | 0.368945  | -0.054311 | H  | -1.405520 | 3.855440  | 4.067255  |
| C  | 1.761697  | 0.063643  | -0.178608 | H  | -2.470433 | 2.538703  | 3.578404  |
| C  | 1.305908  | 1.442245  | -0.636612 | H  | -1.083250 | 2.215714  | 4.622467  |
| H  | 2.015747  | -0.632606 | -0.970705 | Si | -0.431666 | -0.638428 | 2.926190  |
| C  | 2.666997  | -0.016876 | 1.006739  | C  | -0.022234 | -2.275098 | 2.102652  |
| H  | 2.809995  | -1.046224 | 1.336815  | H  | 0.913814  | -2.255444 | 1.545270  |
| H  | 2.300124  | 0.582226  | 1.837483  | H  | 0.071192  | -3.043078 | 2.875027  |
| F  | 3.934800  | 0.485482  | 0.675096  | H  | -0.807753 | -2.594532 | 1.418895  |
| H  | 1.335441  | 1.655864  | -1.696919 | C  | 0.874819  | -0.292419 | 4.233162  |
| H  | 1.623850  | 2.271497  | -0.022063 | H  | 0.854121  | -1.109181 | 4.959841  |
| C  | -0.604438 | 0.773818  | 1.639700  | H  | 1.887638  | -0.240999 | 3.833869  |
| H  | -1.690500 | 0.770653  | 1.475881  | H  | 0.678582  | 0.631353  | 4.778760  |
| Si | -0.360993 | 2.563846  | 2.243762  | C  | -2.090975 | -0.793654 | 3.785631  |
| C  | 1.407832  | 2.998735  | 2.706864  | H  | -2.059024 | -1.600160 | 4.522438  |
| H  | 2.103327  | 3.002525  | 1.867819  | H  | -2.364705 | 0.122942  | 4.309475  |
| H  | 1.409980  | 4.008022  | 3.127998  | H  | -2.884037 | -1.029155 | 3.073801  |
| H  | 1.808711  | 2.330262  | 3.469584  | W  | -1.683255 | -0.643629 | -1.693439 |
| C  | -0.984847 | 3.729869  | 0.912714  | C  | -2.990416 | -1.426860 | -3.040718 |
| H  | -0.921348 | 4.764114  | 1.260061  | O  | -3.726295 | -1.864482 | -3.803415 |
| H  | -0.414479 | 3.655734  | -0.013771 | C  | -2.754476 | -1.529551 | -0.177960 |
| H  | -2.030413 | 3.524407  | 0.672577  | O  | -3.368608 | -2.019679 | 0.657071  |
| C  | -1.428786 | 2.803541  | 3.771166  | C  | -2.827204 | 1.056371  | -1.468238 |

|   |           |          |           |   |           |           |           |
|---|-----------|----------|-----------|---|-----------|-----------|-----------|
| O | -3.448048 | 2.005464 | -1.308327 | C | -0.426098 | -2.279425 | -1.791675 |
| C | -0.648159 | 0.259722 | -3.237465 | O | 0.314339  | -3.151389 | -1.806552 |
| O | -0.077705 | 0.770463 | -4.087778 |   |           |           |           |

**4a<sup>ap-Me</sup>**

E = -1230.17515153232 au

ZPE = 0.15569366 au

|   |           |           |           |   |           |           |           |
|---|-----------|-----------|-----------|---|-----------|-----------|-----------|
| P | 0.029812  | 0.257044  | -0.071993 | H | -1.170826 | -0.251224 | 1.968606  |
| C | 1.754031  | -0.323878 | 0.153955  | W | -1.496674 | -0.376049 | -1.961587 |
| C | 1.609194  | 1.155382  | -0.178792 | C | -2.776653 | -0.876709 | -3.461926 |
| H | 2.084499  | -0.943527 | -0.673290 | O | -3.505375 | -1.163006 | -4.298524 |
| C | 2.321036  | -0.750181 | 1.470463  | C | -2.289978 | -1.855904 | -0.762182 |
| H | 2.157331  | -1.815182 | 1.644216  | O | -2.716883 | -2.673904 | -0.084720 |
| H | 1.908731  | -0.181092 | 2.304049  | C | -2.879326 | 0.972255  | -1.232532 |
| F | 3.706453  | -0.536785 | 1.480898  | O | -3.641287 | 1.721588  | -0.822175 |
| H | 1.934051  | 1.481929  | -1.158115 | C | -0.628050 | 1.120510  | -3.092878 |
| H | 1.838589  | 1.856381  | 0.614891  | O | -0.117645 | 1.953153  | -3.687874 |
| C | -0.682521 | 0.638940  | 1.571023  | C | -0.093352 | -1.716730 | -2.672953 |
| H | -1.442906 | 1.408051  | 1.430977  | O | 0.691449  | -2.456085 | -3.055192 |
| H | 0.056386  | 1.000508  | 2.282581  |   |           |           |           |

**4a<sup>sc-Me</sup>**

E = -1230.17545561617 au

ZPE = 0.15562738 au

|   |           |           |           |   |           |           |           |
|---|-----------|-----------|-----------|---|-----------|-----------|-----------|
| P | 0.006232  | -0.004574 | -0.010268 | H | -0.732637 | -1.175446 | 1.963764  |
| C | 1.833076  | -0.069693 | 0.013187  | W | -1.467900 | -0.745031 | -1.901631 |
| C | 1.241533  | 1.335328  | -0.056742 | C | -2.716669 | -1.357587 | -3.385566 |
| H | 2.247279  | -0.441403 | -0.917901 | O | -3.433885 | -1.706882 | -4.208452 |
| C | 2.619934  | -0.469303 | 1.223064  | C | -1.539247 | -2.632391 | -1.059790 |
| H | 2.268788  | 0.038351  | 2.122916  | O | -1.578225 | -3.676292 | -0.594723 |
| H | 3.682086  | -0.248526 | 1.088129  | C | -3.094110 | -0.167636 | -0.772195 |
| F | 2.509601  | -1.843453 | 1.445564  | O | -3.984532 | 0.158534  | -0.130570 |
| H | 1.353188  | 1.881656  | -0.984088 | C | -1.343889 | 1.147880  | -2.718584 |
| H | 1.341712  | 1.952523  | 0.828547  | O | -1.251149 | 2.199846  | -3.158811 |
| C | -0.586042 | -0.124006 | 1.715947  | C | 0.206056  | -1.288312 | -2.985230 |
| H | -1.548165 | 0.384373  | 1.781589  | O | 1.149744  | -1.571785 | -3.567001 |
| H | 0.100082  | 0.322892  | 2.431898  |   |           |           |           |

**4b<sup>ap-Me</sup>**

E = -1590.17024403476 au

ZPE = 0.15404305 au

|    |           |           |           |   |           |           |           |
|----|-----------|-----------|-----------|---|-----------|-----------|-----------|
| P  | -0.028800 | 0.195119  | -0.007927 | H | -0.970926 | -0.852169 | 1.962570  |
| C  | 1.794148  | -0.042448 | 0.040278  | W | -1.515490 | -0.395983 | -1.941815 |
| C  | 1.334018  | 1.404640  | -0.024718 | C | -2.729515 | -0.844306 | -3.511983 |
| H  | 2.171360  | -0.437786 | -0.896739 | O | -3.412231 | -1.094520 | -4.397527 |
| C  | 2.530164  | -0.551698 | 1.235814  | C | -2.670773 | -1.570540 | -0.697384 |
| H  | 2.606070  | -1.635754 | 1.231130  | O | -3.307366 | -2.220946 | -0.003139 |
| H  | 2.090789  | -0.225160 | 2.173334  | C | -2.683502 | 1.242456  | -1.472032 |
| Cl | 4.239734  | 0.070622  | 1.256927  | O | -3.327456 | 2.148008  | -1.199045 |
| H  | 1.514957  | 1.947183  | -0.943294 | C | -0.328628 | 0.787596  | -3.150299 |
| H  | 1.482892  | 1.997370  | 0.870160  | O | 0.341981  | 1.449547  | -3.799387 |
| C  | -0.670525 | 0.163957  | 1.706199  | C | -0.322948 | -2.032295 | -2.357300 |
| H  | -1.556910 | 0.798677  | 1.739591  | O | 0.345130  | -2.935908 | -2.569886 |
| H  | 0.049183  | 0.527954  | 2.436382  |   |           |           |           |

**4b<sup>sc-Me</sup>**

E = -1590.17030002774 au

ZPE = 0.15400116 au

|    |           |           |           |   |           |           |           |
|----|-----------|-----------|-----------|---|-----------|-----------|-----------|
| P  | 0.027927  | 0.017723  | -0.046926 | H | -0.836430 | -1.025660 | 1.947426  |
| C  | 1.844544  | -0.136397 | 0.042467  | W | -1.441958 | -0.701019 | -1.944981 |
| C  | 1.331971  | 1.294788  | -0.100064 | C | -2.694610 | -1.269466 | -3.443981 |
| H  | 2.265226  | -0.564190 | -0.860984 | O | -3.410323 | -1.595130 | -4.277686 |
| C  | 2.572480  | -0.533568 | 1.288767  | C | -2.219759 | -2.173567 | -0.723517 |
| H  | 2.216070  | 0.002193  | 2.163963  | O | -2.640572 | -2.986204 | -0.036927 |
| H  | 3.644502  | -0.371005 | 1.192100  | C | -2.854371 | 0.635988  | -1.255634 |
| Cl | 2.360316  | -2.294877 | 1.645804  | O | -3.629810 | 1.380555  | -0.861806 |
| H  | 1.507628  | 1.799088  | -1.041522 | C | -0.586460 | 0.786782  | -3.091617 |
| H  | 1.430070  | 1.938969  | 0.765826  | O | -0.079437 | 1.622198  | -3.687856 |
| C  | -0.623119 | 0.004231  | 1.661757  | C | -0.003166 | -2.032020 | -2.609764 |
| H  | -1.556196 | 0.568172  | 1.671730  | O | 0.795642  | -2.764614 | -2.973166 |
| H  | 0.063227  | 0.443249  | 2.382536  |   |           |           |           |

**TS(4a<sup>sc-Me</sup>→3a<sup>Me</sup>)**

E = -1230.09971915625 au

ZPE = 0.15256401 au

 $\bar{\nu} = -519.38 \text{ cm}^{-1}$ 

|   |           |           |           |   |           |           |           |
|---|-----------|-----------|-----------|---|-----------|-----------|-----------|
| P | 0.010533  | -0.087578 | 0.178940  | H | -0.629089 | -1.619885 | 1.931527  |
| C | 1.894604  | 0.750666  | -0.211649 | W | -1.307856 | -0.818801 | -1.778073 |
| C | 0.732860  | 1.558769  | 0.339722  | C | -2.457445 | -1.412368 | -3.359086 |
| H | 2.045593  | 0.780528  | -1.281950 | O | -3.111729 | -1.738418 | -4.240163 |
| C | 2.658264  | -0.126769 | 0.539139  | C | -1.848107 | -2.507545 | -0.708390 |
| H | 2.680789  | -0.065265 | 1.618100  | O | -2.145727 | -3.427926 | -0.100828 |
| H | 3.493664  | -0.634118 | 0.081669  | C | -2.923443 | 0.200159  | -1.001351 |
| F | 1.566594  | -1.666710 | 0.563078  | O | -3.813627 | 0.770726  | -0.562991 |
| H | 0.382102  | 2.320966  | -0.346490 | C | -0.729982 | 0.890249  | -2.770510 |
| H | 0.852423  | 1.934556  | 1.352113  | O | -0.391938 | 1.854254  | -3.288777 |
| C | -0.411053 | -0.556881 | 1.889164  | C | 0.356872  | -1.828985 | -2.514790 |
| H | -1.296907 | 0.025521  | 2.157899  | O | 1.281949  | -2.365686 | -2.907880 |
| H | 0.393521  | -0.330396 | 2.584632  |   |           |           |           |

**3a**

E = -2046.27165469112 au

ZPE = 0.3584766 au

|   |           |           |           |    |           |           |           |
|---|-----------|-----------|-----------|----|-----------|-----------|-----------|
| P | 0.022659  | -0.012491 | -0.005793 | H  | 0.896388  | -0.469022 | -2.112710 |
| C | -0.148544 | 0.446157  | 2.720856  | Si | 2.864895  | -1.058463 | -0.852189 |
| C | 0.846171  | 0.290504  | 1.614135  | C  | 4.160389  | -0.082686 | 0.095985  |
| H | -0.590823 | -0.468130 | 3.100806  | H  | 3.793556  | 0.238252  | 1.072397  |
| C | -0.525179 | 1.613882  | 3.223606  | H  | 5.033404  | -0.717463 | 0.268190  |
| H | -1.265326 | 1.676159  | 4.010227  | H  | 4.498262  | 0.803183  | -0.441895 |
| H | -0.110960 | 2.547891  | 2.861753  | C  | 2.466747  | -2.600477 | 0.149404  |
| F | -0.669370 | 1.445356  | -0.140699 | H  | 3.413738  | -3.115163 | 0.337282  |
| H | 1.508513  | -0.552882 | 1.806798  | H  | 2.003405  | -2.424016 | 1.118330  |
| H | 1.458447  | 1.185961  | 1.504043  | H  | 1.831437  | -3.289582 | -0.404681 |
| W | -1.747785 | -1.759009 | -0.226779 | C  | 3.547655  | -1.676936 | -2.485283 |
| C | -3.269595 | -3.108720 | -0.446404 | H  | 4.366156  | -2.376160 | -2.296351 |
| O | -4.128732 | -3.855655 | -0.572366 | H  | 2.775419  | -2.218972 | -3.036369 |
| C | -0.954611 | -2.793100 | 1.368384  | H  | 3.928074  | -0.882213 | -3.124173 |
| O | -0.479609 | -3.339634 | 2.256531  | Si | 1.732220  | 1.792603  | -1.918814 |
| C | -2.941889 | -0.644460 | 1.053873  | C  | 0.265731  | 2.382183  | -2.926966 |
| O | -3.619440 | -0.040634 | 1.747105  | H  | -0.627670 | 2.513424  | -2.318452 |
| C | -2.425909 | -0.642053 | -1.828968 | H  | 0.499900  | 3.339263  | -3.400543 |
| O | -2.764031 | -0.010386 | -2.720254 | H  | 0.028619  | 1.672217  | -3.723220 |
| C | -0.595880 | -2.841795 | -1.534815 | C  | 2.110619  | 2.996014  | -0.529176 |
| O | 0.044444  | -3.429267 | -2.283880 | H  | 2.409636  | 3.956783  | -0.956176 |
| C | 1.340777  | 0.036708  | -1.247301 | H  | 1.236419  | 3.171119  | 0.098017  |

|   |          |          |           |   |          |          |           |
|---|----------|----------|-----------|---|----------|----------|-----------|
| H | 2.929516 | 2.652491 | 0.104992  | H | 4.135483 | 1.441055 | -2.618142 |
| C | 3.202089 | 1.745547 | -3.091005 | H | 3.019556 | 1.085164 | -3.940565 |
| H | 3.348384 | 2.754092 | -3.487899 |   |          |          |           |

**3a<sup>Me</sup>**

**E = -1230.22585938924 au**

**ZPE = 0.15426054 au**

|   |           |           |           |   |           |           |           |
|---|-----------|-----------|-----------|---|-----------|-----------|-----------|
| P | 0.010533  | -0.087578 | 0.178940  | H | -0.629089 | -1.619885 | 1.931527  |
| C | 1.894604  | 0.750666  | -0.211649 | W | -1.307856 | -0.818801 | -1.778073 |
| C | 0.732860  | 1.558769  | 0.339722  | C | -2.457445 | -1.412368 | -3.359086 |
| H | 2.045593  | 0.780528  | -1.281950 | O | -3.111729 | -1.738418 | -4.240163 |
| C | 2.658264  | -0.126769 | 0.539139  | C | -1.848107 | -2.507545 | -0.708390 |
| H | 2.680789  | -0.065265 | 1.618100  | O | -2.145727 | -3.427926 | -0.100828 |
| H | 3.493664  | -0.634118 | 0.081669  | C | -2.923443 | 0.200159  | -1.001351 |
| F | 1.566594  | -1.666710 | 0.563078  | O | -3.813627 | 0.770726  | -0.562991 |
| H | 0.382102  | 2.320966  | -0.346490 | C | -0.729982 | 0.890249  | -2.770510 |
| H | 0.852423  | 1.934556  | 1.352113  | O | -0.391938 | 1.854254  | -3.288777 |
| C | -0.411053 | -0.556881 | 1.889164  | C | 0.356872  | -1.828985 | -2.514790 |
| H | -1.296907 | 0.025521  | 2.157899  | O | 1.281949  | -2.365686 | -2.907880 |
| H | 0.393521  | -0.330396 | 2.584632  |   |           |           |           |

**TS(4b<sup>sc</sup>→3b<sup>Me</sup>)**

**E = -1590.10284285638 au**

**ZPE = 0.15134951 au**

**$\bar{\nu}$  = -324.90 cm<sup>-1</sup>**

|    |           |           |           |   |           |           |           |
|----|-----------|-----------|-----------|---|-----------|-----------|-----------|
| P  | -0.069225 | 0.123762  | 0.081117  | H | -1.174580 | -0.833765 | 1.983747  |
| C  | 2.093910  | 0.315221  | -0.162796 | W | -1.297406 | -0.745289 | -1.813897 |
| C  | 1.128454  | 1.469187  | 0.034012  | C | -2.444341 | -1.401508 | -3.389980 |
| H  | 2.312408  | 0.053313  | -1.189690 | O | -3.092719 | -1.749014 | -4.263633 |
| C  | 2.623346  | -0.453057 | 0.833115  | C | -2.127816 | -2.171656 | -0.540909 |
| H  | 2.474544  | -0.224178 | 1.877625  | O | -2.589376 | -2.938140 | 0.161711  |
| H  | 3.346278  | -1.220402 | 0.611419  | C | -2.817021 | 0.572167  | -1.352572 |
| Cl | 1.038075  | -2.512613 | 1.100170  | O | -3.659603 | 1.302848  | -1.101048 |
| H  | 1.077532  | 2.125810  | -0.827619 | C | -0.400557 | 0.682367  | -2.985768 |
| H  | 1.249145  | 2.017795  | 0.963829  | O | 0.123555  | 1.495086  | -3.599471 |
| C  | -0.596827 | 0.069710  | 1.816551  | C | 0.213274  | -2.116765 | -2.308405 |
| H  | -1.204464 | 0.965391  | 1.984446  | O | 1.028102  | -2.849332 | -2.605014 |
| H  | 0.248703  | 0.069282  | 2.499005  |   |           |           |           |

**3b<sup>Me</sup>**

**E = -1590.20589538021 au**

**ZPE = 0.15301611 au**

|    |           |           |           |   |           |           |           |
|----|-----------|-----------|-----------|---|-----------|-----------|-----------|
| P  | -0.234350 | -0.305210 | 0.493042  | H | -2.140381 | -0.182863 | 1.964615  |
| C  | 2.339096  | 0.303972  | -0.392078 | W | -1.298055 | -0.876712 | -1.690085 |
| C  | 1.249717  | 0.794893  | 0.505489  | C | -2.192306 | -1.359929 | -3.463010 |
| H  | 2.195058  | 0.461751  | -1.454349 | O | -2.693430 | -1.632045 | -4.455771 |
| C  | 3.424867  | -0.326679 | 0.035111  | C | -2.270609 | -2.443046 | -0.739609 |
| H  | 3.599357  | -0.511437 | 1.088566  | O | -2.812230 | -3.296044 | -0.207105 |
| H  | 4.174368  | -0.685412 | -0.657678 | C | -2.852539 | 0.382999  | -1.207920 |
| Cl | 0.500078  | -1.938565 | 1.546873  | O | -3.695491 | 1.101777  | -0.916975 |
| H  | 0.876896  | 1.770437  | 0.176567  | C | -0.341493 | 0.696560  | -2.609619 |
| H  | 1.589967  | 0.886222  | 1.538269  | O | 0.190376  | 1.576722  | -3.114793 |
| C  | -1.283367 | 0.461470  | 1.773978  | C | 0.318020  | -2.101670 | -2.127714 |
| H  | -1.645870 | 1.418334  | 1.394084  | O | 1.214203  | -2.765075 | -2.372727 |
| H  | -0.728490 | 0.615770  | 2.698785  |   |           |           |           |

TS(4a<sup>sc-Me</sup>→5<sup>Me</sup>·HF)

E = -1230.06267687134 au

ZPE = 0.14709186 au

$\bar{\nu}$  = -1860.40 cm<sup>-1</sup>

|   |           |           |           |   |           |           |           |
|---|-----------|-----------|-----------|---|-----------|-----------|-----------|
| P | -0.137671 | 0.231677  | 0.107810  | H | -1.170955 | -0.871056 | 2.000039  |
| C | 1.632448  | 0.148512  | 0.348510  | W | -1.467083 | -0.417753 | -1.909039 |
| C | 1.144187  | 1.559639  | 0.220638  | C | -2.577375 | -0.928288 | -3.539114 |
| H | 2.469128  | -0.393307 | -0.518411 | O | -3.204856 | -1.212507 | -4.454430 |
| C | 2.563628  | -0.476437 | 1.177734  | C | -2.706771 | -1.541122 | -0.702589 |
| H | 2.420291  | -1.493572 | 1.516580  | O | -3.384051 | -2.166468 | -0.023405 |
| H | 3.371490  | 0.078146  | 1.640773  | C | -2.641622 | 1.248276  | -1.589639 |
| F | 3.578289  | -1.025906 | -0.376843 | O | -3.282993 | 2.176761  | -1.397756 |
| H | 1.360607  | 2.091932  | -0.698673 | C | -0.198590 | 0.718308  | -3.084074 |
| H | 1.138475  | 2.188531  | 1.105380  | O | 0.503198  | 1.360593  | -3.718560 |
| C | -0.894215 | 0.159252  | 1.775062  | C | -0.257037 | -2.079242 | -2.177277 |
| H | -1.803595 | 0.761581  | 1.773860  | O | 0.406784  | -2.998765 | -2.310481 |
| H | -0.211626 | 0.526699  | 2.540832  |   |           |           |           |

5<sup>Me</sup>·HF

E = -1230.14947996159 au

ZPE = 0.15008096 au

|   |           |           |           |   |           |           |           |
|---|-----------|-----------|-----------|---|-----------|-----------|-----------|
| P | -0.220165 | 0.330242  | 0.278486  | H | -1.651047 | -0.405832 | 2.080235  |
| C | 1.461697  | 0.047745  | 0.799671  | W | -1.337926 | -0.455817 | -1.814532 |
| C | 1.234255  | 1.467709  | 0.431864  | C | -2.309205 | -1.091685 | -3.487517 |
| H | 2.666104  | -0.614161 | -1.009034 | O | -2.863924 | -1.446276 | -4.424994 |
| C | 2.394648  | -0.786196 | 1.227017  | C | -2.556030 | -1.641156 | -0.649458 |
| H | 2.177590  | -1.833028 | 1.402612  | O | -3.224893 | -2.296210 | 0.010781  |
| H | 3.404915  | -0.445463 | 1.432904  | C | -2.647021 | 1.124104  | -1.607345 |
| F | 2.932777  | -0.361402 | -1.868267 | O | -3.358544 | 2.010819  | -1.471293 |
| H | 1.664820  | 1.820962  | -0.500161 | C | -0.093491 | 0.742730  | -2.965388 |
| H | 1.235896  | 2.205991  | 1.228157  | O | 0.581713  | 1.413918  | -3.594427 |
| C | -1.180590 | 0.543526  | 1.824003  | C | 0.038368  | -1.996547 | -1.941462 |
| H | -1.965527 | 1.280004  | 1.647185  | O | 0.812181  | -2.836729 | -1.969618 |
| H | -0.546519 | 0.868235  | 2.647507  |   |           |           |           |

5<sup>Me</sup>

E = -1129.79883847875 au

ZPE = 0.13883527 au

|   |           |           |           |   |           |           |           |
|---|-----------|-----------|-----------|---|-----------|-----------|-----------|
| P | -0.202995 | 0.320716  | 0.281706  | W | -1.330449 | -0.460041 | -1.819557 |
| C | 1.482847  | 0.057028  | 0.782077  | C | -2.291513 | -1.081209 | -3.502110 |
| C | 1.242207  | 1.472982  | 0.407621  | O | -2.837682 | -1.426818 | -4.448746 |
| C | 2.420756  | -0.777652 | 1.181962  | C | -2.539121 | -1.666326 | -0.658423 |
| H | 2.208093  | -1.825944 | 1.351613  | O | -3.201681 | -2.328352 | 0.000153  |
| H | 3.439511  | -0.443881 | 1.350891  | C | -2.651728 | 1.107938  | -1.594783 |
| H | 1.655960  | 1.832086  | -0.529858 | O | -3.368745 | 1.988945  | -1.451153 |
| H | 1.234092  | 2.218476  | 1.197497  | C | -0.089056 | 0.758411  | -2.934489 |
| C | -1.168845 | 0.559021  | 1.820303  | O | 0.608123  | 1.437949  | -3.535300 |
| H | -1.953649 | 1.293621  | 1.635564  | C | 0.060846  | -1.984316 | -1.976148 |
| H | -0.532209 | 0.892920  | 2.638193  | O | 0.846685  | -2.811613 | -2.043294 |
| H | -1.639015 | -0.386569 | 2.091335  |   |           |           |           |

5

E = -1945.84648791552 au

ZPE = 0.34223717 au

|   |           |          |          |   |          |           |          |
|---|-----------|----------|----------|---|----------|-----------|----------|
| P | -0.202995 | 0.320716 | 0.281706 | C | 2.420756 | -0.777652 | 1.181962 |
| C | 1.482847  | 0.057028 | 0.782077 | H | 2.208093 | -1.825944 | 1.351613 |
| C | 1.242207  | 1.472982 | 0.407621 | H | 3.439511 | -0.443881 | 1.350891 |

|   |           |           |           |   |           |           |           |
|---|-----------|-----------|-----------|---|-----------|-----------|-----------|
| H | 1.655960  | 1.832086  | -0.529858 | C | -2.539121 | -1.666326 | -0.658423 |
| H | 1.234092  | 2.218476  | 1.197497  | O | -3.201681 | -2.328352 | 0.000153  |
| C | -1.168845 | 0.559021  | 1.820303  | C | -2.651728 | 1.107938  | -1.594783 |
| H | -1.953649 | 1.293621  | 1.635564  | O | -3.368745 | 1.988945  | -1.451153 |
| H | -0.532209 | 0.892920  | 2.638193  | C | -0.089056 | 0.758411  | -2.934489 |
| H | -1.639015 | -0.386569 | 2.091335  | O | 0.608123  | 1.437949  | -3.535300 |
| W | -1.330449 | -0.460041 | -1.819557 | C | 0.060846  | -1.984316 | -1.976148 |
| C | -2.291513 | -1.081209 | -3.502110 | O | 0.846685  | -2.811613 | -2.043294 |
| O | -2.837682 | -1.426818 | -4.448746 |   |           |           |           |

**TS(4a<sup>ap</sup>-Me→8·HF)**

**E = -1230.06654733482 au**

**ZPE = 0.15117635 au**

**$\bar{\nu}$  = -405.57 cm<sup>-1</sup>**

|   |           |           |           |   |           |           |           |
|---|-----------|-----------|-----------|---|-----------|-----------|-----------|
| P | 0.095672  | 0.400334  | -0.204389 | H | -1.099304 | 0.435863  | 1.908680  |
| C | 1.718927  | -0.811804 | 0.167271  | W | -1.477384 | -0.308415 | -1.947041 |
| C | 1.855860  | 0.635646  | -0.307037 | C | -2.836939 | -0.867895 | -3.379202 |
| H | 1.868496  | -1.578710 | -0.581322 | O | -3.598240 | -1.185120 | -4.169293 |
| C | 1.738157  | -1.156031 | 1.499692  | C | -1.933037 | -1.999095 | -0.835969 |
| H | 2.000540  | -2.176662 | 1.761816  | O | -2.168438 | -2.926125 | -0.213500 |
| H | 1.494354  | -0.467488 | 2.291622  | C | -2.964394 | 0.731592  | -0.952151 |
| F | 2.710592  | 0.788729  | 2.356348  | O | -3.777092 | 1.307645  | -0.394136 |
| H | 2.271556  | 0.708582  | -1.304431 | C | -0.996740 | 1.374339  | -3.063804 |
| H | 2.320046  | 1.228714  | 0.485416  | O | -0.724697 | 2.293213  | -3.682662 |
| C | -0.389294 | 1.091376  | 1.405956  | C | 0.043123  | -1.322716 | -2.913020 |
| H | -0.895437 | 2.034865  | 1.183864  | O | 0.902749  | -1.870855 | -3.429290 |
| H | 0.491007  | 1.285501  | 2.023509  |   |           |           |           |

**8·HF**

**E = -1230.15394049703 au**

**ZPE = 0.15067609 au**

|   |           |           |           |   |           |           |           |
|---|-----------|-----------|-----------|---|-----------|-----------|-----------|
| P | 0.124305  | 0.913658  | -0.320285 | H | -1.134018 | 2.574153  | 0.846540  |
| C | 2.099733  | -1.039258 | -0.129254 | W | -1.482669 | -0.253500 | -1.770446 |
| C | 1.908891  | 0.452450  | -0.170899 | C | -2.844929 | -1.239066 | -2.937737 |
| H | 2.304228  | -1.524065 | -1.076263 | O | -3.606141 | -1.789110 | -3.590009 |
| C | 2.009728  | -1.767307 | 0.976579  | C | -1.533579 | -1.813418 | -0.398574 |
| H | 2.149060  | -2.840068 | 0.947268  | O | -1.568719 | -2.669622 | 0.353219  |
| H | 1.783421  | -1.324102 | 1.939511  | C | -2.999622 | 0.712234  | -0.747043 |
| F | 0.112873  | 0.194681  | 3.069540  | O | -3.825189 | 1.259246  | -0.177235 |
| H | 2.423073  | 0.885641  | -1.031895 | C | -1.445412 | 1.292892  | -3.148674 |
| H | 2.295979  | 0.930593  | 0.729166  | O | -1.430229 | 2.138133  | -3.916140 |
| C | -0.147090 | 2.138039  | 0.762117  | C | 0.051601  | -1.180671 | -2.790946 |
| H | 0.644376  | 2.592996  | 1.344412  | O | 0.899959  | -1.687597 | -3.367242 |
| H | -0.139546 | 0.688553  | 2.311216  |   |           |           |           |

**8<sup>bis</sup>**

**E = -2046.19958553053 au**

**ZPE = 0.35625764 au**

|   |           |           |           |   |           |           |           |
|---|-----------|-----------|-----------|---|-----------|-----------|-----------|
| P | -0.118589 | -0.082847 | -0.090931 | H | 0.975015  | 2.086653  | -0.374074 |
| C | 2.595395  | 0.766261  | 0.098540  | C | -1.157647 | 0.577374  | 1.037285  |
| C | 1.265212  | 1.051941  | -0.540268 | H | -0.187817 | -0.514594 | 2.495274  |
| H | 3.439771  | 1.218403  | -0.413620 | W | 0.055142  | -2.222960 | -1.398835 |
| C | 2.819213  | 0.037354  | 1.182784  | C | 0.379792  | -3.889796 | -2.523665 |
| H | 3.825332  | -0.099445 | 1.556863  | O | 0.576488  | -4.821641 | -3.159177 |
| H | 2.031213  | -0.448449 | 1.744483  | C | 0.604404  | -3.238023 | 0.330261  |
| F | 0.204665  | -0.909845 | 3.256015  | O | 0.915335  | -3.788296 | 1.279156  |
| H | 1.361780  | 0.934517  | -1.623889 | C | -1.891596 | -2.894261 | -1.223055 |

|    |           |           |           |    |           |           |           |
|----|-----------|-----------|-----------|----|-----------|-----------|-----------|
| O  | -2.939064 | -3.351472 | -1.206300 | H  | -2.441338 | 1.969534  | 3.925655  |
| C  | -0.485958 | -1.138247 | -3.072027 | H  | -0.816831 | 1.316925  | 4.150508  |
| O  | -0.777284 | -0.519353 | -3.988751 | Si | -2.821764 | -0.350807 | 1.242393  |
| C  | 2.036928  | -1.793165 | -1.786315 | C  | -3.994764 | 0.422468  | 2.491743  |
| O  | 3.128758  | -1.626114 | -2.081187 | H  | -3.662338 | 0.275649  | 3.518571  |
| Si | -1.027614 | 2.285892  | 1.862259  | H  | -4.190214 | 1.482427  | 2.336807  |
| C  | 0.644215  | 3.149322  | 1.787369  | H  | -4.948096 | -0.103265 | 2.380454  |
| H  | 0.838746  | 3.652285  | 0.839709  | C  | -3.694524 | -0.233348 | -0.418149 |
| H  | 0.626531  | 3.923851  | 2.558796  | H  | -4.020755 | 0.798343  | -0.572923 |
| H  | 1.481772  | 2.487928  | 2.007407  | H  | -3.057608 | -0.504679 | -1.257730 |
| C  | -2.275866 | 3.401863  | 1.005149  | H  | -4.579296 | -0.873340 | -0.440854 |
| H  | -2.272648 | 4.393184  | 1.465717  | C  | -2.559179 | -2.096834 | 1.876117  |
| H  | -2.014921 | 3.522314  | -0.049015 | H  | -3.498715 | -2.651561 | 1.818387  |
| H  | -3.293715 | 3.015245  | 1.052480  | H  | -1.804429 | -2.661504 | 1.337884  |
| C  | -1.390312 | 2.129544  | 3.700461  | H  | -2.253065 | -2.057341 | 2.923230  |
| H  | -1.084963 | 3.058492  | 4.188685  |    |           |           |           |

TS(4b<sup>ap-Me</sup>→8<sup>l</sup>·HCl)

E = -1590.09041913536 au

ZPE = 0.1510507 au

$\bar{\nu}$  = -158.88 cm<sup>-1</sup>

|    |           |           |           |   |           |           |           |
|----|-----------|-----------|-----------|---|-----------|-----------|-----------|
| P  | 0.081395  | 0.412607  | -0.234974 | H | -1.024761 | 0.382745  | 1.923079  |
| C  | 1.809776  | -0.816764 | 0.135561  | W | -1.499806 | -0.310950 | -1.929719 |
| C  | 1.851171  | 0.610533  | -0.369829 | C | -2.882671 | -0.872941 | -3.351652 |
| H  | 1.942073  | -1.593182 | -0.607039 | O | -3.651612 | -1.186572 | -4.133589 |
| C  | 1.780211  | -1.156398 | 1.458866  | C | -1.960752 | -1.996440 | -0.804838 |
| H  | 1.963773  | -2.186579 | 1.740807  | O | -2.201259 | -2.917279 | -0.177383 |
| H  | 1.571560  | -0.453135 | 2.246954  | C | -2.965021 | 0.741280  | -0.914357 |
| Cl | 3.138349  | 1.124651  | 2.605232  | O | -3.757756 | 1.326227  | -0.338525 |
| H  | 2.223258  | 0.685726  | -1.385120 | C | -1.029760 | 1.359629  | -3.073472 |
| H  | 2.324729  | 1.272688  | 0.361464  | O | -0.764316 | 2.270310  | -3.705389 |
| C  | -0.382772 | 1.082779  | 1.389717  | C | 0.012296  | -1.334034 | -2.902980 |
| H  | -0.966613 | 1.983918  | 1.182200  | O | 0.869916  | -1.883423 | -3.419345 |
| H  | 0.493950  | 1.348218  | 1.984240  |   |           |           |           |

8<sup>l</sup>·HCl

E = -1590.13578091014 au

ZPE = 0.1495461 au

|    |           |           |           |   |           |           |           |
|----|-----------|-----------|-----------|---|-----------|-----------|-----------|
| P  | -0.286910 | 1.429169  | 0.117983  | H | -0.683826 | -0.527689 | 1.623570  |
| C  | 1.851859  | -0.552419 | -0.366352 | W | -1.362059 | -0.197813 | -1.857983 |
| C  | 0.967958  | 0.559566  | -0.700589 | C | -2.746781 | -1.043505 | -3.053566 |
| H  | 2.509296  | -0.848730 | -1.179169 | O | -3.540991 | -1.519786 | -3.729253 |
| C  | 1.977303  | -1.218929 | 0.788635  | C | -1.214844 | -1.902598 | -0.705084 |
| H  | 2.699540  | -2.019637 | 0.874007  | O | -1.119798 | -2.846979 | -0.067622 |
| H  | 1.380541  | -1.011281 | 1.662394  | C | -2.966947 | 0.420272  | -0.701826 |
| Cl | 3.068513  | 1.888623  | 2.145973  | O | -3.868553 | 0.724551  | -0.070026 |
| H  | 1.317705  | 1.126203  | -1.558097 | C | -1.413497 | 1.558781  | -2.964624 |
| H  | 2.961134  | 0.820097  | 1.426282  | O | -1.434767 | 2.523573  | -3.573746 |
| C  | -0.636635 | 0.555555  | 1.708498  | C | 0.115993  | -0.961567 | -3.102860 |
| H  | -1.597729 | 0.919548  | 2.073266  | O | 0.914312  | -1.405313 | -3.788511 |
| H  | 0.127089  | 0.832776  | 2.438506  |   |           |           |           |

8<sup>l</sup>

E = -1129.80079320121 au

ZPE = 0.14107465 au

|   |           |           |           |   |          |           |           |
|---|-----------|-----------|-----------|---|----------|-----------|-----------|
| P | -0.272313 | 1.382803  | 0.116261  | C | 0.971230 | 0.502845  | -0.705006 |
| C | 1.801681  | -0.644874 | -0.347008 | H | 2.229433 | -1.178497 | -1.191315 |



|   |           |           |           |   |           |           |           |
|---|-----------|-----------|-----------|---|-----------|-----------|-----------|
| C | 2.125758  | -1.059226 | 0.878962  | O | -3.556991 | -1.443102 | -3.793484 |
| H | 2.776622  | -1.912656 | 1.014429  | C | -1.288936 | -1.906849 | -0.744492 |
| H | 1.788522  | -0.556593 | 1.773124  | O | -1.232102 | -2.868227 | -0.128616 |
| H | 1.330739  | 1.042590  | -1.576330 | C | -2.992106 | 0.445734  | -0.714379 |
| C | -0.635255 | 0.462685  | 1.679020  | O | -3.891093 | 0.754622  | -0.080642 |
| H | -1.667530 | 0.676911  | 1.957913  | C | -1.411506 | 1.595531  | -2.946908 |
| H | 0.007358  | 0.840842  | 2.477219  | O | -1.418020 | 2.571765  | -3.538762 |
| H | -0.501807 | -0.613946 | 1.593858  | C | 0.088702  | -0.942474 | -3.106017 |
| W | -1.389902 | -0.177798 | -1.870306 | O | 0.893335  | -1.390257 | -3.782914 |
| C | -2.767559 | -0.988081 | -3.097056 |   |           |           |           |

TS(8'→8'')

E = -1129.78581205553 au

ZPE = 0.13912654 au

$\bar{\nu}$  = -118.90 cm<sup>-1</sup>

|   |           |           |           |   |           |           |           |
|---|-----------|-----------|-----------|---|-----------|-----------|-----------|
| P | -0.073110 | 1.129666  | -0.194223 | W | -1.561317 | -0.141897 | -2.004483 |
| C | 2.239186  | -0.618350 | 0.052331  | C | -2.951074 | -1.114142 | -3.064823 |
| C | 1.348376  | 0.298746  | -0.616248 | O | -3.760507 | -1.674364 | -3.658512 |
| H | 3.225752  | -0.713366 | -0.391841 | C | -1.126469 | -1.854941 | -0.949928 |
| C | 1.950775  | -1.389031 | 1.109733  | O | -0.869224 | -2.793249 | -0.345478 |
| H | 2.690629  | -2.067340 | 1.513228  | C | -3.056202 | 0.345550  | -0.667776 |
| H | 0.977269  | -1.400266 | 1.573904  | O | -3.890156 | 0.607734  | 0.070160  |
| H | 1.678126  | 0.595452  | -1.607468 | C | -1.908545 | 1.626815  | -3.027059 |
| C | -0.510058 | 0.734587  | 1.551886  | O | -2.104552 | 2.595533  | -3.599584 |
| H | -1.291322 | 1.429451  | 1.859903  | C | -0.121922 | -0.646461 | -3.405655 |
| H | 0.352767  | 0.861065  | 2.207193  | O | 0.650603  | -0.940113 | -4.196455 |
| H | -0.900766 | -0.277333 | 1.658753  |   |           |           |           |

8''·HCl

E = -1590.14565549824 au

ZPE = 0.14745618 au

|    |           |           |           |   |           |           |           |
|----|-----------|-----------|-----------|---|-----------|-----------|-----------|
| P  | -0.195743 | -0.287037 | -0.009646 | H | 0.004515  | 0.275494  | 2.356411  |
| C  | 2.080933  | -1.473626 | 1.232244  | W | -1.652973 | -0.049779 | -1.987487 |
| C  | 1.121775  | -1.303195 | 0.158296  | C | -2.840648 | 0.169831  | -3.637810 |
| H  | 2.453250  | -2.488133 | 1.348396  | O | -3.499186 | 0.291127  | -4.565722 |
| C  | 2.575644  | -0.529233 | 2.040314  | C | -2.250503 | -2.026227 | -1.812966 |
| H  | 3.295725  | -0.782736 | 2.806405  | O | -2.573447 | -3.117408 | -1.717139 |
| H  | 2.321563  | 0.516366  | 1.938003  | C | -3.171244 | 0.557701  | -0.729716 |
| Cl | 2.614495  | 1.799772  | -1.134043 | O | -3.985397 | 0.905893  | -0.005079 |
| H  | 1.206459  | -2.011300 | -0.661611 | C | -1.073262 | 1.932571  | -2.188134 |
| H  | 2.165219  | 0.619288  | -0.856554 | O | -0.778491 | 3.028195  | -2.309736 |
| C  | -0.371900 | 0.773736  | 1.463418  | C | -0.059897 | -0.647141 | -3.162831 |
| H  | -1.426768 | 1.016914  | 1.584492  | O | 0.837189  | -0.982476 | -3.785872 |
| H  | 0.178046  | 1.705016  | 1.316279  |   |           |           |           |

TS(8''·HCl→3b<sup>Me</sup>)

E = -1590.11109050425 au

ZPE = 0.14631814 au

$\bar{\nu}$  = -507.93 cm<sup>-1</sup>

|    |           |           |           |   |           |           |           |
|----|-----------|-----------|-----------|---|-----------|-----------|-----------|
| P  | -0.198243 | -0.208155 | -0.084620 | H | 1.438277  | -1.731315 | -0.828656 |
| C  | 2.050303  | -1.358826 | 1.228832  | H | 1.883767  | 0.047850  | -0.482788 |
| C  | 1.364791  | -0.987539 | -0.036843 | C | -0.374602 | 0.741040  | 1.442654  |
| H  | 2.001116  | -2.409448 | 1.500501  | H | -1.402354 | 1.080219  | 1.551813  |
| C  | 2.714817  | -0.508610 | 2.004326  | H | 0.288861  | 1.605213  | 1.348514  |
| H  | 3.194229  | -0.846368 | 2.913856  | H | -0.058118 | 0.156634  | 2.306657  |
| H  | 2.821857  | 0.535500  | 1.735827  | W | -1.639191 | -0.048830 | -1.968166 |
| Cl | 2.229083  | 1.731872  | -0.968292 | C | -2.865972 | 0.142677  | -3.639001 |

|   |           |           |           |   |           |           |           |
|---|-----------|-----------|-----------|---|-----------|-----------|-----------|
| O | -3.534124 | 0.247092  | -4.555196 | C | -1.083998 | 1.961990  | -2.213994 |
| C | -2.206933 | -2.040548 | -1.813443 | O | -0.814659 | 3.053826  | -2.355407 |
| O | -2.510456 | -3.136946 | -1.738923 | C | -0.043543 | -0.641214 | -3.165691 |
| C | -3.150895 | 0.567596  | -0.708991 | O | 0.828432  | -0.980544 | -3.812696 |
| O | -3.957090 | 0.920448  | 0.019640  |   |           |           |           |

TS(**8''**·HCl→**3b''Me**)

E = -1590.11190485742 au

ZPE = 0.14618818 au

$\bar{\nu}$  = -1273.00 cm<sup>-1</sup>

|    |           |           |           |   |           |           |           |
|----|-----------|-----------|-----------|---|-----------|-----------|-----------|
| P  | -0.050003 | -0.463748 | -0.204367 | H | -0.762645 | 0.288914  | 1.993669  |
| C  | 2.620909  | -0.613464 | 0.558222  | W | -1.535827 | -0.015438 | -2.065764 |
| C  | 1.589904  | -0.889667 | -0.346984 | C | -2.774971 | 0.428507  | -3.652028 |
| H  | 3.624228  | -0.724363 | 0.155476  | O | -3.456994 | 0.677218  | -4.533719 |
| C  | 2.516369  | 0.028127  | 1.789895  | C | -3.046607 | -1.051071 | -1.117457 |
| H  | 3.432212  | 0.242443  | 2.326155  | O | -3.869549 | -1.623963 | -0.567284 |
| H  | 1.651878  | -0.120642 | 2.423089  | C | -2.181940 | 1.720234  | -1.110946 |
| Cl | 0.865945  | 2.228310  | 0.681448  | O | -2.565920 | 2.659025  | -0.593612 |
| H  | 1.884492  | -1.107394 | -1.367171 | C | 0.036271  | 1.014682  | -2.952157 |
| H  | 1.915912  | 1.224152  | 1.265047  | O | 0.914203  | 1.561780  | -3.430116 |
| C  | -0.672819 | -0.677010 | 1.499729  | C | -0.908921 | -1.741155 | -3.022907 |
| H  | -0.031712 | -1.339309 | 2.077398  | O | -0.553270 | -2.692757 | -3.544201 |
| H  | -1.665789 | -1.119799 | 1.418495  |   |           |           |           |

**8''**·HCl

E = -1590.20012309791 au

ZPE = 0.15300061 au

|    |           |           |           |   |           |           |           |
|----|-----------|-----------|-----------|---|-----------|-----------|-----------|
| P  | 0.330243  | 0.014246  | -0.496748 | H | 1.715349  | 1.623116  | 0.736780  |
| C  | 1.024878  | -1.244153 | 1.975201  | W | -1.573866 | -0.048747 | -2.120056 |
| C  | 0.147773  | -0.978282 | 1.005133  | C | -3.096460 | -0.081351 | -3.480298 |
| H  | 0.662236  | -1.866129 | 2.790913  | O | -3.941466 | -0.098030 | -4.253072 |
| C  | 2.450077  | -0.825723 | 2.104299  | C | -0.937763 | -1.922286 | -2.738298 |
| H  | 3.084478  | -1.710952 | 2.204746  | O | -0.584638 | -2.954912 | -3.074004 |
| H  | 2.584740  | -0.242771 | 3.020466  | C | -2.785947 | -0.923195 | -0.703350 |
| Cl | 2.125448  | -0.657963 | -1.335643 | O | -3.448181 | -1.403174 | 0.098624  |
| H  | -0.843898 | -1.407029 | 1.088600  | C | -2.182213 | 1.805635  | -1.459348 |
| H  | 2.813288  | -0.249295 | 1.259854  | O | -2.514488 | 2.831482  | -1.073656 |
| C  | 0.846618  | 1.667014  | 0.084185  | C | -0.329974 | 0.840605  | -3.515130 |
| H  | 0.005221  | 2.101919  | 0.625821  | O | 0.358166  | 1.335464  | -4.281570 |
| H  | 1.065733  | 2.288124  | -0.783539 |   |           |           |           |

HF

E = -100.344372577033 au

ZPE = 0.0092737 au

|   |          |          |          |   |           |          |          |
|---|----------|----------|----------|---|-----------|----------|----------|
| H | 0.912362 | 0.000000 | 0.000000 | F | -0.012362 | 0.000000 | 0.000000 |
|---|----------|----------|----------|---|-----------|----------|----------|
